# Supplementary material for: Impact of renin-angiotensin system inhibitors on clinical outcomes and ventricular remodelling after transcatheter aortic valve implantation: rationale and design of the RASTAVI randomised multicentre study
Source: PubMed Central journal article supplement — BMJ Open. 2018 Feb 13;8(2):e020255. doi: 10.1136/bmjopen-2017-020255 (PMC5829899; doi:10.1136/bmjopen-2017-020255), 2018-02-13
Supplement: bmjopen-2017-020255.reviewer_comments.pdf [file bmjopen-2017-020255.reviewer_comments.pdf]

## PEER REVIEW HISTORY

BMJ Open publishes all reviews undertaken for accepted manuscripts. Reviewers are asked to complete a checklist review form (<http://bmjopen.bmj.com/site/about/resources/checklist.pdf>) and are provided with free text boxes to elaborate on their assessment. These free text comments are reproduced below.

### ARTICLE DETAILS

|                            |                                                                                                                                                                                                                                                                                                                                                                                                                                   |
|----------------------------|-----------------------------------------------------------------------------------------------------------------------------------------------------------------------------------------------------------------------------------------------------------------------------------------------------------------------------------------------------------------------------------------------------------------------------------|
| <b>TITLE (PROVISIONAL)</b> | Impact of Renin-Angiotensin System inhibitors on clinical outcomes and ventricular remodelling after Transcatheter Aortic Valve Implantation: Rationale and design of the RASTAVI randomized multicentre study.                                                                                                                                                                                                                   |
| <b>AUTHORS</b>             | Amat-Santos, Ignacio; Catalá, Pablo; Diez del Hoyo, Felipe; Fernandez-Diaz, Jose; Alonso-Briales, Juan; Del Trigo, María; Regueiro, Ander; Juan-Salvadores, Pablo; Serra, Vicente; Gutierrez-Ibanes, Enrique; Muñoz-García, Antonio; Nombela-Franco, Luis; Sabate, Manel; Jimenez-Diaz, Victor; Garcia del Blanco, Bruno; Lopez, Javier; Varela-Falcón, Luis; Sevilla, Teresa; Arnold, Roman; Revilla, Ana; San Roman, J. Alberto |

### VERSION 1 – REVIEW

|                        |                                                                                     |
|------------------------|-------------------------------------------------------------------------------------|
| <b>REVIEWER</b>        | Philippe Pibarot<br>Québec Heart & Lung Institute, Laval University, Québec, Canada |
| <b>REVIEW RETURNED</b> | 11-Nov-2017                                                                         |

|                         |                                                                                                                                                                  |
|-------------------------|------------------------------------------------------------------------------------------------------------------------------------------------------------------|
| <b>GENERAL COMMENTS</b> | This is an important and well designed RCT proposal. The attached protocols still includes some corrections in tracked changes. Please include the final version |
|-------------------------|------------------------------------------------------------------------------------------------------------------------------------------------------------------|

|                        |                                                                                                                                            |
|------------------------|--------------------------------------------------------------------------------------------------------------------------------------------|
| <b>REVIEWER</b>        | Michael Gotzmann<br>Ruhr-Universität Bochum<br>Kardiologische Klinik<br>Marien Hospital Witten<br>Marienplatz 2<br>58452 Witten<br>Germany |
| <b>REVIEW RETURNED</b> | 14-Nov-2017                                                                                                                                |

|                         |                                                                                                                                                                                                                                                                                                                                                                                                                                                                                                                                                         |
|-------------------------|---------------------------------------------------------------------------------------------------------------------------------------------------------------------------------------------------------------------------------------------------------------------------------------------------------------------------------------------------------------------------------------------------------------------------------------------------------------------------------------------------------------------------------------------------------|
| <b>GENERAL COMMENTS</b> | The present study protocol is well written, accurate and comprehensive. The planned study is relevant and important. Minor comment: In the meantime, a study on RAS blockade and TAVI has been published. Please complete the results of the study of Ochiai T et al.<br>(Renin-angiotensin system blockade therapy after transcatheter aortic valve implantation. Ochiai T, Saito S, Yamanaka F, Shishido K, Tanaka Y, Yamabe T, Shirai S, Tada N, Araki M, Naganuma T, Watanabe Y, Yamamoto M, Hayashida K. Heart. 2017 Oct 6. [Epub ahead of print]) |
|-------------------------|---------------------------------------------------------------------------------------------------------------------------------------------------------------------------------------------------------------------------------------------------------------------------------------------------------------------------------------------------------------------------------------------------------------------------------------------------------------------------------------------------------------------------------------------------------|

## VERSION 1 – AUTHOR RESPONSE

Reviewer: 1

This is an important and well designed RCT proposal.

The attached protocols still includes some corrections in tracked changes. Please include the final versión.

Response: We thank the reviewer for his positive comments. The corrected final version of the protocol was attached.

Reviewer: 2

The present study protocol is well written, accurate and comprehensive. The planned study is relevant and important.

Minor comment: In the meantime, a study on RAS blockade and TAVI has been published. Please complete the results of the study of Ochiai T et al.

(Renin-angiotensin system blockade therapy after transcatheter aortic valve implantation. Ochiai T, Saito S, Yamanaka F, Shishido K, Tanaka Y, Yamabe T, Shirai S, Tada N, Araki M, Naganuma T, Watanabe Y, Yamamoto M, Hayashida K. Heart. 2017 Oct 6. [Epub ahead of print])

Response: We thank the reviewer for his positive comments. The suggested reference has been included
