# Supplementary material for: Impact of renin-angiotensin system inhibitors on clinical outcomes and ventricular remodelling after transcatheter aortic valve implantation: rationale and design of the RASTAVI randomised multicentre study
Source: PubMed Central journal article supplement — BMJ Open. 2018 Feb 13;8(2):e020255. doi: 10.1136/bmjopen-2017-020255 (PMC5829899; doi:10.1136/bmjopen-2017-020255), 2018-02-13
Supplement: bmjopen-2017-020255supp001.pdf [file bmjopen-2017-020255supp001.pdf]

# **Título: Beneficio del bloqueo del sistema renina-angiotensina sobre la evolución clínica y el remodelado ventricular tras la colocación de una prótesis percutánea aórtica.**

**Promotor e investigador principal:** José Alberto San Román Calvar

**Indicación:** TAVI

**Código del Protocolo:** RASTAVI

**Fecha del protocolo:** 03 Julio 2017

**Nº EudraCT:** 2017-002799-18

**Nº ClinicalTrials:** NCT03201185

## DECLARACIÓN DE CONFIDENCIALIDAD

La información de este documento contiene información que es privilegiada o confidencial y no deben ser reveladas a menos que la divulgación se requiera por ley. En cualquier caso, se informa a las personas a las que se les revela esta información que ésta es privilegiada o confidencial y no la deben revelar. Estas restricciones en la revelación se aplicarán igualmente para toda futura información que se le aporte, indicada como privilegiada o confidencial.

|                                         |                                       |
|-----------------------------------------|---------------------------------------|
| <i>Código protocolo: ICICOR-2017-01</i> | <i>Versión protocolo: 1.0</i>         |
| <i>EudraCT Number: 2017-002799-18</i>   | <i>Fecha protocolo: 03 Julio 2017</i> |

## **RESPONSABILIDADES**

### **PROMOTOR E INVESTIGADOR PRINCIPAL:**

Dr. José Alberto San Román  
Hospital Clínico de Valladolid  
Tel. +3498342014 - Fax +34983255305

\_\_\_\_\_ | | |  
*firma* *fecha*

### **CRO:**

Alphabioreserch, S.L.  
Paseo de la Castellana 163 – 2º izquierda. 28046 Madrid, España  
Tel.: +34917452520 – Fax +34917450653

### **Responsable de la coordinación de las actividades de monitorización:**

Dr. M<sup>a</sup> Teresa Bricio Vicente  
Alphabioreserch, S.L.  
Paseo de la Castellana 163 – 2º izquierda  
28046 Madrid, España  
Tel.: +34917452520 – Fax +34917450653

\_\_\_\_\_ | | |  
*firma* *fecha*

### **Estadístico:**

Itziar Gómez  
Hospital Clínico de Valladolid  
Tel. +3498342014 - Fax +34983255305

\_\_\_\_\_ | | |  
*firma* *fecha*

|                                         |                                       |
|-----------------------------------------|---------------------------------------|
| <i>Código protocolo: ICICOR-2017-01</i> | <i>Versión protocolo: 1.0</i>         |
| <i>EudraCT Number: 2017-002799-18</i>   | <i>Fecha protocolo: 03 Julio 2017</i> |

## **PÁGINA DE APROBACIÓN DEL INVESTIGADOR**

Entiendo que toda la información relacionada con el estudio que me ha proporcionado el Dr José Alberto San Román Calvar, o sus colaboradores, respecto al protocolo del estudio, es una información confidencial. Esta información incluye: Protocolo, Manual del investigador, Cuaderno de Recogida de Datos, Hoja de Información al Paciente y otros documentos relacionados con este estudio.

Entiendo que cualquier cambio en el protocolo de este estudio tiene que ser aprobado por escrito el Dr José Alberto San Román Calvar, el investigador principal y el comité ético antes de su implementación, con la excepción de donde sea necesario para eliminar riesgos aparentes e inmediatos a los pacientes.

Confirmando que llevaré a cabo el estudio de acuerdo con este protocolo, las Normas de Buena Práctica Clínica, la Declaración de Helsinki en vigor y la legislación aplicable a este tipo de estudios.

Confirmando que registraré e informaré todos los acontecimientos adversos que ocurran durante el estudio, de acuerdo con este protocolo.

Confirmando que estoy informado de la necesidad de guardar la documentación y que ningún dato se puede destruir sin el consentimiento por escrito del Dr José Alberto San Román Calvar.

**Investigador Principal:** \_\_\_\_\_

Institución: \_\_\_\_\_

Dirección: \_\_\_\_\_

Firma: \_\_\_\_\_

\_\_\_\_\_|\_\_\_\_\_|\_\_\_\_\_|\_\_\_\_\_|  
Fecha

|                                         |                                       |
|-----------------------------------------|---------------------------------------|
| <i>Código protocolo: ICICOR-2017-01</i> | <i>Versión protocolo: 1.0</i>         |
| <i>EudraCT Number: 2017-002799-18</i>   | <i>Fecha protocolo: 03 Julio 2017</i> |

## **INDICE**

|                                                              |    |
|--------------------------------------------------------------|----|
| 1. RESUMEN DEL ESTUDIO .....                                 | 6  |
| 2. GLOSARIO Y DEFINICIONES.....                              | 7  |
| 3. RELACIÓN DE INVESTIGADORES Y TAREAS A REALIZAR .....      | 8  |
| 4. INTRODUCCION Y ESTADO ACTUAL DEL TEMA.....                | 8  |
| 5. BIBLIOGRAFÍA.....                                         | 11 |
| 6. EXPERIENCIA DEL GRUPO INVESTIGADOR SOBRE EL TEMA.....     | 13 |
| 7. HIPÓTESIS .....                                           | 14 |
| 8. OBJETIVO.....                                             | 14 |
| 8.1. OBJETIVO PRIMARIO .....                                 | 14 |
| 8.2. OBJETIVOS SECUNDARIOS .....                             | 14 |
| 9. DISEÑO .....                                              | 15 |
| 9.1. POBLACIÓN.....                                          | 15 |
| 9.2. CRITERIOS DE INCLUSIÓN .....                            | 15 |
| 9.3. CRITERIOS DE EXCLUSIÓN.....                             | 15 |
| 9.4. CONSENTIMIENTO INFORMADO.....                           | 16 |
| 10. PLAN DE ANALISIS ESTADISTICO Y TAMAÑO DE LA MUESTRA..... | 16 |
| 10.1. ANALISIS ESTADISTICO Y SISTEMA DE ALEATORIZACIÓN.....  | 16 |
| 10.2. TAMAÑO DE LA MUESTRA.....                              | 16 |
| 11. INTERVENCIÓN .....                                       | 17 |
| 11.1. TRATAMIENTO DEL ESTUDIO.....                           | 17 |
| 11.2. ADMINISTRACION DE LA MEDICACION .....                  | 17 |
| 12. IMAGEN CARDÍACA.....                                     | 17 |
| 12.1. ESTUDIOS DE ECOCARDIOGRAFÍA TRANSTORÁCICA .....        | 17 |
| 12.2. ESTUDIOS DE RESONANCIA MAGNÉTICA CARDIACA .....        | 18 |
| 12.3. ANALISIS DE LOS PARAMETROS DE IMAGEN .....             | 18 |
| 13. SEGUIMIENTO DE LOS PACIENTES .....                       | 19 |
| 13.1. VALORACIÓN INICIAL DEL PACIENTE .....                  | 19 |
| 13.2. SEGUIMIENTO CLINICO Y DE IMAGEN.....                   | 19 |
| 13.3. ASIGNACION DE EVENTOS .....                            | 20 |
| 13.4. ABANDONO DEL ESTUDIO.....                              | 20 |
| 14. PLAN DE TRABAJO.....                                     | 20 |

|                                         |                                       |
|-----------------------------------------|---------------------------------------|
| <i>Código protocolo: ICICOR-2017-01</i> | <i>Versión protocolo: 1.0</i>         |
| <i>EudraCT Number: 2017-002799-18</i>   | <i>Fecha protocolo: 03 Julio 2017</i> |

|                                                             |    |
|-------------------------------------------------------------|----|
| 15. GESTIÓN DE DATOS.....                                   | 21 |
| 15.1. RECOGIDA DE DATOS:.....                               | 21 |
| 15.2. GESTIÓN DE DATOS.....                                 | 22 |
| 15.3. CONFIDENCIALIDAD DE LOS DATOS .....                   | 22 |
| 16. EVALUACIONES DE SEGURIDAD .....                         | 22 |
| 16.1. MEDICIONES DE SEGURIDAD .....                         | 22 |
| 16.2. ACONTECIMIENTOS ADVERSOS .....                        | 22 |
| 17. CONSIDERACIONES REGULATORIAS Y ÉTICAS .....             | 29 |
| 18. CONSIDERACIONES PRÁCTICAS .....                         | 30 |
| 18.1. MANUAL DEL INVESTIGADOR .....                         | 30 |
| 18.2. CUADERNO DE RECOGIDA DE DATOS (CRD) .....             | 30 |
| 18.3. DOCUMENTOS FUENTE .....                               | 30 |
| 18.4. CONFIDENCIALIDAD Y CUSTODIA DE LA DOCUMENTACIÓN ..... | 30 |
| 18.5. PROCEDIMIENTOS DE MONITORIZACIÓN Y AUDITORÍA:.....    | 30 |
| 18.6. CONDICIONES DE ARCHIVO DE DATOS Y DOCUMENTOS .....    | 33 |
| 18.7. MODIFICACIONES DEL PROTOCOLO .....                    | 34 |
| 18.8. INFORME FINAL .....                                   | 34 |
| 18.9. CONDICIONES DE PUBLICACIÓN .....                      | 34 |
| 18.10. SEGURO .....                                         | 35 |
| 19. UTILIDAD PRÁCTICA DE LOS RESULTADOS .....               | 35 |
| 20. ÉTICA .....                                             | 36 |
| 21. ANEXOS .....                                            | 37 |
| ANEXO I. CONSENTIMIENTO INFORMADO .....                     | 37 |
| ANEXO II: TABLAS Y FIGURAS.....                             | 39 |
| ANEXO III: DECLARACIÓN DE HELSINKI.....                     | 39 |

|                                         |                                       |
|-----------------------------------------|---------------------------------------|
| <i>Código protocolo: ICICOR-2017-01</i> | <i>Versión protocolo: 1.0</i>         |
| <i>EudraCT Number: 2017-002799-18</i>   | <i>Fecha protocolo: 03 Julio 2017</i> |

## 1. RESUMEN DEL ESTUDIO

|                                                  |                                                                                                                                                                                                                                                                                                                                                                                                                                                                                                                                                                                                                                                                                                                                                                                                                                                                                                                                                                                                                                                                                                                                                                                                                               |
|--------------------------------------------------|-------------------------------------------------------------------------------------------------------------------------------------------------------------------------------------------------------------------------------------------------------------------------------------------------------------------------------------------------------------------------------------------------------------------------------------------------------------------------------------------------------------------------------------------------------------------------------------------------------------------------------------------------------------------------------------------------------------------------------------------------------------------------------------------------------------------------------------------------------------------------------------------------------------------------------------------------------------------------------------------------------------------------------------------------------------------------------------------------------------------------------------------------------------------------------------------------------------------------------|
| <b>Título y código del estudio</b>               | Beneficio Del Bloqueo Del Sistema Renina-Angiotensina Sobre La Evolución Clínica Y El Remodelado Ventricular Tras La Colocación De Una Prótesis Percutánea Aórtica (RASTAVI)                                                                                                                                                                                                                                                                                                                                                                                                                                                                                                                                                                                                                                                                                                                                                                                                                                                                                                                                                                                                                                                  |
| <b>Tipo y diseño del estudio</b>                 | Estudio aleatorizado, abierto, prospectivo, nacional de grupos paralelos                                                                                                                                                                                                                                                                                                                                                                                                                                                                                                                                                                                                                                                                                                                                                                                                                                                                                                                                                                                                                                                                                                                                                      |
| <b>Fase del estudio</b>                          | Fase IV                                                                                                                                                                                                                                                                                                                                                                                                                                                                                                                                                                                                                                                                                                                                                                                                                                                                                                                                                                                                                                                                                                                                                                                                                       |
| <b>Objetivo del estudio</b>                      | Comprobar el beneficio clínico y sobre el remodelado ventricular adverso del bloqueo del sistema renina-angiotensina tras la colocación de una prótesis percutánea aórtica.                                                                                                                                                                                                                                                                                                                                                                                                                                                                                                                                                                                                                                                                                                                                                                                                                                                                                                                                                                                                                                                   |
| <b>Tratamiento(s) del estudio</b>                | Los pacientes del grupo de tratamiento activo recibirán, además del tratamiento habitual, ramipril 2,5 mg/día antes del alta. El objetivo es dosis de 10 mg/día a titularse en las visitas de seguimiento.                                                                                                                                                                                                                                                                                                                                                                                                                                                                                                                                                                                                                                                                                                                                                                                                                                                                                                                                                                                                                    |
| <b>Número y características de los pacientes</b> | Serán reclutados en el estudio, total de 336 pacientes adultos de ambos sexos con colocación de una prótesis percutánea aórtica por estenosis aórtica severa; 168 para cada grupo de tratamiento (habitual o habitual más ramipril).                                                                                                                                                                                                                                                                                                                                                                                                                                                                                                                                                                                                                                                                                                                                                                                                                                                                                                                                                                                          |
| <b>Duración del estudio</b>                      | <p><i>Período de reclutamiento:</i> se reclutarán pacientes a los que se les haya implantado una prótesis percutánea aórtica por estenosis aórtica severa antes del alta, tiempo en que se obtendrán los datos clínicos, ecocardiográficos y de resonancia magnética cardíaca. Inmediatamente después de la inclusión se <i>aleatorizará</i> a cada paciente a la rama de tratamiento habitual o habitual más ramipril.</p> <p><i>Período de seguimiento:</i> se realizará seguimiento clínico y de imagen antes del alta, en consulta a los tres, seis y doce meses y de manera presencial o telefónica a los tres años.</p> <p>Inclusión: 2 años y seis meses<br/>Seguimiento: 3 años<br/>Análisis datos: 6 meses<br/>Total: 6 años</p>                                                                                                                                                                                                                                                                                                                                                                                                                                                                                     |
| <b>Eventos</b>                                   | <p><i>Evento principal:</i> eventos cardiovasculares, que incluye muerte de causa cardíaca, ingreso por insuficiencia cardíaca e ictus, en un seguimiento de 3 años, en pacientes que han recibido tratamiento habitual más ramipril frente a pacientes que han recibido el tratamiento habitual.</p> <p><i>Eventos secundarios:</i> evolución del remodelado ventricular izquierdo al año de seguimiento entre el grupo de tratamiento activo y el grupo control. Concretamente se evaluarán: Masa ventricular, fibrosis miocárdica, dimensiones ventriculares y fracción de eyección. Además, se compararán otros aspectos entre el grupo de tratamiento activo y el grupo control:</p> <ol style="list-style-type: none"> <li>1) Capacidad funcional al año de seguimiento</li> <li>2) Muerte de causa cardíaca (si la causa de muerte no se conoce se considerará de causa cardíaca) al año y a los tres años del seguimiento.</li> <li>3) Ingreso por insuficiencia cardíaca al año y a los tres años del seguimiento.</li> <li>4) Ictus (síntomas compatibles y demostración con técnica de imagen) al año y a los tres años del seguimiento.</li> <li>5) Muerte de cualquier causa al año y a los tres años</li> </ol> |
| <b>Países y centros participantes</b>            | Participará un centro en España: Hospital Universitario de Valladolid. Se estipula ampliar el estudio a más centros en el ámbito nacional.                                                                                                                                                                                                                                                                                                                                                                                                                                                                                                                                                                                                                                                                                                                                                                                                                                                                                                                                                                                                                                                                                    |

|                                         |                                       |
|-----------------------------------------|---------------------------------------|
| <i>Código protocolo: ICICOR-2017-01</i> | <i>Versión protocolo: 1.0</i>         |
| <i>EudraCT Number: 2017-002799-18</i>   | <i>Fecha protocolo: 03 Julio 2017</i> |

## **2. GLOSARIO Y DEFINICIONES**

|        |                                                     |
|--------|-----------------------------------------------------|
| E Ao   | Estenosis aórtica                                   |
| E Ao-d | Estenosis aórtica degenerativa                      |
| PPAo   | Prótesis percutánea aórtica                         |
| SVAo   | Sustitución valvular aórtica                        |
| SRA    | Sistema renina-angiotensina                         |
| IECA   | Inhibidor de la enzima convertidora de angiotensina |
| TA     | Tensión arterial                                    |
| ECG    | Electrocardiograma                                  |
| HR     | Hazard ratio                                        |
| RM     | Resonancia magnética                                |
| ETT    | Ecocardiograma transtorácico                        |
| ITV    | Integral tiempo-velocidad                           |
| ORE    | Orificio regurgitante efectivo                      |
| TAPSE  | Excursión sistólica del anillo tricúspide           |
| CRO    | Compañía de investigación por contraro              |
| CRD    | Cuaderno de recogida de datos                       |
| MI     | Manual del investigador                             |
| AE     | Evento adverso                                      |
| SAE    | Evento adverso grave                                |
| CEIC   | Comité ético de investigación clínica               |
| ICH    | Conferencia de armonización internacional           |

|                                         |                                       |
|-----------------------------------------|---------------------------------------|
| <i>Código protocolo: ICICOR-2017-01</i> | <i>Versión protocolo: 1.0</i>         |
| <i>EudraCT Number: 2017-002799-18</i>   | <i>Fecha protocolo: 03 Julio 2017</i> |

### **3. RELACIÓN DE INVESTIGADORES Y TAREAS A REALIZAR**

#### **HOSPITAL DE VALLADOLID**

##### **Investigador principal:**

- *José Alberto San Román.* Coordinador del estudio. Responsable de la concepción, elaboración y redacción del protocolo.

##### **Investigadores colaboradores:**

*Instituto de Ciencias del Corazón (ICICOR). Hospital Clínico de Valladolid:*

- *Ignacio Amat-Santos.* Responsable de la selección de los pacientes.
- *Luis Varela-Falcón.* Responsable de la programación de pruebas, seguimiento clínico y recogida de datos.
- *Salvatore Di Stefano.* Co-responsable de la selección de los pacientes y recogida de datos.
- *Roman Arnold.* Responsable de la adquisición e interpretación ecocardiográfica.
- *Teresa Sevilla.* Responsable de la adquisición e interpretación de la resonancia magnética.
- *Itziar Gómez.* Consultora para la metodología y estadística del estudio.
- *Silvio Vera.* Co-responsable de la programación de pruebas y seguimiento clínico.

Existe la intención de aumentar el número de centros colaboradores para realizar un estudio de índole multicéntrico nacional.

### **4. INTRODUCCION Y ESTADO ACTUAL DEL TEMA**

#### **El problema: la estenosis aórtica degenerativa**

La estenosis aórtica degenerativa (EAo-d) es el final de una enfermedad lentamente progresiva que se relaciona con la aterosclerosis, la inflamación, factores hemodinámicos y la calcificación activa. Su prevalencia es alta y depende de la edad. Más del 2% de personas mayores de 75 años tiene estenosis aórtica y llega al 8% en personas mayores de 84.<sup>1</sup> Cuando los síntomas aparecen, la enfermedad es rápidamente progresiva y es necesario la sustitución valvular aórtica (SVAo) quirúrgica o percutánea. Es, por tanto, una enfermedad con un gran impacto en la sociedad. La Asociación Europea de Cirugía Cardiorrástica estima que en 2010 se realizaron 41.917 sustituciones valvulares aórticas en Europa.<sup>2</sup> Sin duda, nos enfrentamos a un grave problema de salud que aumentará en el futuro dado el envejecimiento de la población.

El proyecto que se presenta es continuación de dos proyectos previos titulados "Receptores tipo toll en la patogénesis de la estenosis aórtica degenerativa: una nueva diana terapéutica" (FIS PI 11/00264) y "Estenosis aórtica degenerativa en pacientes asintomáticos: nuevos marcadores de alto riesgo (FIS PI 14/00022) que han dado lugar a diversos hallazgos y publicaciones (ver experiencia del grupo).

#### **La prótesis percutánea aórtica**

Dado el perfil degenerativo de la estenosis aórtica, la mayor parte de los casos severos sintomáticos y que por tanto precisan tratamiento, ocurren a una edad avanzada. No sólo la edad, sino la aparición de comorbilidades en esta población

|                                         |                                       |
|-----------------------------------------|---------------------------------------|
| <i>Código protocolo: ICICOR-2017-01</i> | <i>Versión protocolo: 1.0</i>         |
| <i>EudraCT Number: 2017-002799-18</i>   | <i>Fecha protocolo: 03 Julio 2017</i> |

envejecida condicionan que el riesgo quirúrgico se incrementa, lo que hace que hasta el 30% de los pacientes no sean candidatos a SVAo quirúrgica y hasta otro 30% presente elevado riesgo. Esta realidad favoreció el desarrollo de una terapia menos invasiva: La prótesis percutánea aórtica (PPAo). El estudio aleatorizado PARTNER (Placement of AoRTic traNscathetER valve) demostró en su cohorte B una reducción de la mortalidad y una superior mejoría en la capacidad funcional con esta terapia frente a la terapia médica estándar en pacientes inoperables.<sup>3</sup> La cohorte A de este estudio objetivó que no había diferencias en supervivencia frente a la cirugía convencional en pacientes operables con alto riesgo quirúrgico.<sup>4</sup> Finalmente, el estudio PIVOTAL, de nuevo en una población de alto riesgo quirúrgico, demostró superior supervivencia frente a la cirugía.<sup>5</sup> Más recientemente los estudios PARTNER-II y SURTAVI han demostrado que también en pacientes que presentan riesgo intermedio la PPAo tiene unos resultados comparables a los de la cirugía convencional.<sup>6,7</sup> Ante estos datos, el recambio percutáneo valvular aórtico se ha extendido rápidamente hacia poblaciones que tienen una mayor esperanza de vida lo que ha despertado nuevas incógnitas sobre el comportamiento de la PPAo.

### **El nuevo problema: evolución a largo plazo tras la colocación de una prótesis percutánea aórtica (PPAo)**

Aunque el hecho de evitar la esternotomía y la circulación extracorpórea mediante el acceso alternativo por vía transfemoral, transapical u otra tiene múltiples ventajas, existen una serie de problemas técnicos y clínicos en este procedimiento que, o bien son específicos, o bien cobran una mayor relevancia que en el recambio quirúrgico:

1) los eventos cerebrovasculares se producen no sólo por la manipulación de grandes catéteres en la aorta, sino también por el desarrollo de fibrilación auricular *de novo* (frecuente como respuesta a ventricúlos con alteración diastólica importante). No hay evidencias en lo referente al manejo antitrombótico más adecuado a corto y medio plazo.

2) los trastornos de la conducción aurículo-ventricular que provocan la necesidad de implante de marcapasos definitivo en el 20 a 40% de los pacientes. Además, el 20% de los pacientes desarrollan bloqueo completo de rama izquierda cuya importancia pronóstica a largo plazo es desconocida. Aunque hasta ahora no hay datos de impacto en la mortalidad, la falta de sincronía en la contracción ventricular puede condicionar una peor evolución funcional secundaria a un remodelado adverso e incluso riesgo de muerte súbita.

3) las complicaciones vasculares, aún frecuentes tras el implante de PPAo, se tratan en muchos casos de forma percutánea. El impacto a largo plazo del implante de stents en la femoral común es objeto de gran controversia.

4) la valvulopatía residual por una mala posición de la prótesis ocasiona insuficiencia aórtica residual y un gradiente residual elevado, y ambos tienen un impacto fundamental en el remodelado ventricular, la recuperación funcional y la supervivencia.

5) la degeneración valvular y la durabilidad de la PPAo es actualmente objeto de controversia. Algunos factores como la presencia de insuficiencia residual, la endocarditis infecciosa y la trombosis de los velos están detrás de una degeneración precoz de la prótesis. Además, en las series con seguimiento más prolongado se ha observado un progresivo incremento de los gradientes trans-próticos que para algunos autores cuestiona el implante de PPAo en pacientes con una esperanza de vida superior a 10 años.<sup>8</sup>

### **El remodelado ventricular adverso en la estenosis aórtica severa**

La EAo provoca un aumento de la postcarga ventricular, lo cual da lugar a una respuesta ventricular compensadora caracterizada por aumento de la precarga, aumento del estrés miocárdico, hipertrofia ventricular izquierda y fibrosis miocárdica.

|                                         |                                       |
|-----------------------------------------|---------------------------------------|
| <i>Código protocolo: ICICOR-2017-01</i> | <i>Versión protocolo: 1.0</i>         |
| <i>EudraCT Number: 2017-002799-18</i>   | <i>Fecha protocolo: 03 Julio 2017</i> |

La respuesta necesaria para mantener un gasto adecuado cuando la postcarga aumenta es aumentar la precarga (ley de Frank-Starling). Esa respuesta inicialmente fisiológica provoca hipertrofia y fibrosis, ambas relacionadas con un mal pronóstico en pacientes con estenosis aórtica.<sup>9,10</sup> El sistema renina-angiotensina (SRA) juega un papel clave en este fenotipo pues regula el grado de hipertrofia ventricular izquierda como se ha demostrado en ratas<sup>11</sup> y la extensión de la fibrosis como se ha demostrado en biopsias de ventrículos humanos.<sup>12</sup> Se ha visto que la hipertrofia provocada por el SRA es independiente de la bajada de presión arterial sistémica.<sup>13</sup>

### **Efectos positivos del bloqueo del sistema renina-angiotensina en la estenosis aórtica severa**

Teóricamente, el bloqueo del SRA evitaría o al menos retrasaría el remodelado adverso. En un estudio con ratas a las que se había provocado una estenosis en la aorta ascendente mediante “banding”, la administración de fármacos que bloquean el SRA evitó el remodelado adverso que se produjo en el grupo control.<sup>14</sup> Se ha comprobado en humanos que el bloqueo del SRA reduce la hipertrofia ventricular izquierda independientemente del efecto sobre la presión arterial,<sup>15</sup> lo que sugiere un efecto directo sobre el ventrículo. Además, disminuye la fibrosis miocárdica.<sup>16</sup> Como consecuencia de lo anterior, se ha visto que el bloqueo del SRA mejora el pronóstico en diversas entidades clínicas: tras un infarto de miocardio,<sup>17</sup> insuficiencia cardíaca<sup>18</sup> e hipertensión arterial.<sup>15</sup> En este sentido las evidencias del bloqueo del SRA en la estenosis aórtica severa son escasas. Recientemente, se ha demostrado que la administración de trandolapril durante 8 semanas disminuye el NT-pro-BNP y el volumen telesistólico ventricular izquierdo.<sup>19</sup> En un estudio aleatorizado en pacientes asintomáticos con EAo moderada o severa se observó una disminución de la masa ventricular al año de seguimiento.<sup>20</sup> Otros autores han encontrado una disminución de la tasa de progresión de la hipertrofia ventricular.<sup>21</sup> Un estudio retrospectivo en más de 2000 pacientes sugiere que el bloqueo del SRA aumenta la supervivencia en pacientes con EAo.<sup>22</sup>, es interesante que el aumento de supervivencia fuera independiente de la severidad de la EAo.

### **Efectos positivos del bloqueo del sistema renina-angiotensina tras la sustitución valvular quirúrgica**

La sustitución de la válvula aórtica nativa por una prótesis disminuye la postcarga. Sin embargo, el seguimiento a largo plazo de estos pacientes sugiere que la reversión del remodelado desfavorable puede no ser completa lo cual explicaría la alta morbilidad y mortalidad tras el reemplazo valvular. Se ha visto que la persistencia de hipertrofia ventricular izquierda y disfunción diastólica tras la sustitución aórtica aumentan la mortalidad.<sup>23,24</sup>

Hay pocas evidencias que apoyen el teórico beneficio de bloquear el SRA y así mejorar el pronóstico de estos pacientes. Un estudio retrospectivo en 150 pacientes sugiere que el tratamiento con bloqueantes del SRA disminuye las admisiones por insuficiencia cardíaca y la muerte.<sup>25</sup> El aspecto más interesante de este estudio es que el efecto de los fármacos fue independiente de la función ventricular y de las dimensiones ventriculares, es decir, el bloqueo de SRA fue beneficioso también en pacientes con función ventricular conservada y sin dilatación ventricular. En otro estudio similar con un mayor número de pacientes (n= 1752) y un análisis de propensión, se demuestra un aumento de la supervivencia, aunque el bloqueo del SRA no varió la masa ventricular izquierda, la fracción de eyección ni el tamaño auricular izquierdo.<sup>26</sup> Ambos estudios tienen importantes limitaciones, pues además de ser retrospectivos, tienen criterios muy laxos de inclusión y no especifican el tipo ni la dosis de bloqueantes del SRA. El único estudio prospectivo aleatorizado se hizo en 114 pacientes y comparó candesartán (32 mg al día) con un grupo control.<sup>27</sup> Un año

|                                         |                                       |
|-----------------------------------------|---------------------------------------|
| <i>Código protocolo: ICICOR-2017-01</i> | <i>Versión protocolo: 1.0</i>         |
| <i>EudraCT Number: 2017-002799-18</i>   | <i>Fecha protocolo: 03 Julio 2017</i> |

después de la sustitución valvular aórtica, se observó una disminución de la masa ventricular en ambos grupos que fue más marcada en el grupo que recibió candesartán.

### **Bloqueo del sistema renina-angiotensina tras la colocación de una prótesis percutánea aórtica**

Las evidencias mostradas apoyan la posibilidad de que el bloqueo del SRA acelere el remodelado favorable del ventrículo izquierdo revertiendo la hipertrofia y la fibrosis, y eso dé lugar a una mejoría del pronóstico a largo plazo de los pacientes. No hay ninguna evidencia al respecto. Nuestro grupo ha hecho un análisis retrospectivo en 250 pacientes a los que hemos colocado una PPAo. De ellos, 134 (53.6%) fueron tratados con bloqueantes del SRA. Comparados con el grupo control (n=116), el cual no presentaba diferencias basales respecto a función ventricular, estos pacientes presentaron mejor clase funcional al año de seguimiento y una tendencia a una menor mortalidad en el mismo periodo. Estos hallazgos, aunque deben ser interpretados con cautela dado que no se realizó un ajuste por otras variables relevantes, sugieren que podría existir un impacto pronóstico de los bloqueadores del SRA en pacientes sometidos a implante de PPAo.

### **Elección del ramipril para bloquear el SRA en pacientes con prótesis percutánea aórtica**

El ramipril es un inhibidor del enzima convertidor de la angiotensina (IECA). Aunque algunos autores consideran que existe un efecto de clase de todos los IECAs, la mayoría de expertos consideran que las diferencias en la lipofilia, duración de acción, vida media, disponibilidad de bradiquinina y otras propiedades farmacológicas, apoyan que no existe tal efecto. Entre los IECAs disponibles, el ramipril tiene un perfil clínico favorable y unos resultados excelentes en los ensayos clínicos por lo que algunos autores le consideran el IECA de elección. En un ensayo clínico aleatorizado publicado en 2000 que cambió el concepto de la prevención del remodelado ventricular y de eventos clínicos con IECAs,<sup>28</sup> se demostró que la administración de ramipril reducía la incidencia de muerte, infarto de miocardio e ictus en pacientes de alto riesgo cardiovascular, sin disfunción ventricular conocida ni insuficiencia cardíaca. Por primera vez se vió que el bloqueo del SRA previene eventos en pacientes de alto riesgo (prevención primaria). En relación con el estudio que aquí se propone debe subrayarse además que la población del estudio referido es muy similar a la población con estenosis aórtica severa tratada con prótesis percutánea aórtica: el 80% tenían historia de enfermedad coronaria, el 43% enfermedad arterial periférica, el 65% dislipemia y el 47% hipertensión arterial.

## **5. BIBLIOGRAFÍA**

1. Lindroos M, et al. Prevalence of aortic valve abnormalities in the elderly: an echocardiographic study of a random population sample. *J Am Coll Cardiol* 1993;21:1220-1225.
2. Bridgewater B et al. Fourth ECATS Adult Cardiac Surgical Database Report: towards global benchmarking. Dendrite Clinical Systems ISBN 1-903968-26-7.
3. Leon MB, et al. Transcatheter Aortic-Valve Implantation for Aortic Stenosis in Patients Who Cannot Undergo Surgery. *N Engl J Med*. 2010;363:1597-1607.
4. Smith CR, et al. Transcatheter versus Surgical Aortic-Valve Replacement in High-Risk Patients. *N Engl J Med*. 2011;364:2187-2198.

|                                         |                                       |
|-----------------------------------------|---------------------------------------|
| <i>Código protocolo: ICICOR-2017-01</i> | <i>Versión protocolo: 1.0</i>         |
| <i>EudraCT Number: 2017-002799-18</i>   | <i>Fecha protocolo: 03 Julio 2017</i> |

5. Adams DH, et al. Transcatheter aortic valve replacement with a self-expanding prosthesis. *N Engl J Med* 2014;370:1790-1798.
6. Leon MB, et al. Transcatheter or Surgical Aortic-Valve Replacement in Intermediate-Risk Patients. *N Engl J Med* 2016; 374:1609-1620
7. Reardon MJ, et al. Surgical or Transcatheter Aortic-Valve Replacement in Intermediate-Risk Patients. *N Engl J Med* 2017; 376:1321-1331
8. Del Trigo M, et al. Incidence, timing, and predictors of valve hemodynamic deterioration after transcatheter aortic valve replacement: Multicenter registry. *J Am Coll cardiol.* 2016;67:644-655.
9. Cioffi G, et al. Prognostic effect of inappropriately high left ventricular mass in asymptomatic severe aortic stenosis. *Heart.* 2011;97:301-7
10. Dweck MR, et al. Midwall fibrosis is an independent predictor of mortality in patients with aortic stenosis. *J Am Coll Cardiol.* 2011;58:1271-9.
11. Schunkert H, et al. Distribution and functional significance of cardiac angiotensin converting enzyme in hypertrophied rat hearts. *Circulation.* 1993;87:1328-39.
12. Fielitz J, et al. Activation of the cardiac renin-angiotensin system and increased myocardial collagen expression in human aortic valve disease. *J Am Coll Cardiol.* 2001;37:1443-9.
13. Fujisaka T, et al. Angiotensin II promotes aortic valve thickening independent of elevated blood pressure in apolipoprotein-E deficient mice. *Atherosclerosis.* 2013;226:82-7.
14. Litwin SE, et al. Serial echocardiographic-Doppler assessment of left ventricular geometry and function in rats with pressure-overload hypertrophy. Chronic angiotensin-converting enzyme inhibition attenuates the transition to heart failure. *Circulation.* 1995;91(10):2642-54.
15. Dahlöf B. Reversal of left ventricular hypertrophy in hypertensive patients. A metaanalysis of 109 treatment studies. *Am J Hypertens.* 1992;5(2):95-110.
16. Díez J, et al. Losartan-dependent regression of myocardial fibrosis is associated with reduction of left ventricular chamber stiffness in hypertensive patients. *Circulation.* 2002;105:2512-7.
17. CONSENSUS Trial Study Group. Effects of enalapril on mortality in severe congestive heart failure. Results of the Cooperative North Scandinavian Enalapril Survival Study (CONSENSUS). *N Engl J Med.* 1987;316:1429-35.
18. Greenberg B, et al. Effects of long-term enalapril therapy on cardiac structure and function in patients with left ventricular dysfunction. Results of the SOLVD echocardiography substudy. *Circulation.* 1995;91(10):2573-81.
19. Dalsgaard M, . Short-term hemodynamic effect of angiotensin-converting enzyme inhibition in patients with severe aortic stenosis: a placebo-controlled, randomized study. *Am Heart J.* 2014;167:226-34.
20. Bull S, et al. A prospective, double-blind, randomized controlled trial of the angiotensin-converting enzyme inhibitor Ramipril In Aortic Stenosis (RIAS trial). *Eur Heart J Cardiovasc Imaging.* 2015;16:834-41.
21. Bang CN. Renin-angiotensin system inhibition is not associated with increased sudden cardiac death, CV mortality or all-cause mortality in patients with aortic stenosis. *Int J Cardiol.* 2014;175:492-8.
22. Nadir MA, et al. Impact of renin-angiotensin system blockade therapy on outcome in aortic stenosis. *J Am Coll Cardiol.* 2011;58:570-6.
23. Lund O et al. Predictable changes in left ventricular mass and function during ten years after valve replacement for aortic stenosis. *J Heart Valve Dis.* 2004;13:357-68.
24. Gjertsson P, et al. Preoperative moderate to severe diastolic dysfunction: a novel Doppler echocardiographic long-term prognostic factor in patients with severe aortic stenosis. *J Thorac Cardiovasc Surg.* 2005;129:890-6.

|                                         |                                       |
|-----------------------------------------|---------------------------------------|
| <i>Código protocolo: ICICOR-2017-01</i> | <i>Versión protocolo: 1.0</i>         |
| <i>EudraCT Number: 2017-002799-18</i>   | <i>Fecha protocolo: 03 Julio 2017</i> |

25. Yiu KH, et al .Improved prognosis following renin-angiotensin-aldosterone system blockade in patients undergoing concomitant aortic and mitral valve replacement. *Int J Cardiol.* 2014;177:680-2.
26. Goel SS, et al. Renin-angiotensin system blockade therapy after surgical aortic valve replacement for severe aortic stenosis: a cohort study. *Ann Intern Med.* 2014;161:699-710.
27. Dahl JS, et al. Effect of candesartan treatment on left ventricular remodeling after aortic valve replacement for aortic stenosis. *Am J Cardiol.* 2010;106:713-9.
28. Yusuf S, et al. Effects of an angiotensin-converting-enzyme inhibitor, ramipril, on cardiovascular events in high-risk patients. *N Engl J Med* 2000;342:145-53.

## **6. EXPERIENCIA DEL GRUPO INVESTIGADOR SOBRE EL TEMA**

El Instituto de Ciencias de Corazón. (ICICOR) <http://www.icicor.es/> Servicio de cardiología. Hospital Clínico Universitario de Valladolid está acreditado como Grupo de Excelencia investigadora por la Consejería de Educación de la Junta de Castilla y León. Es miembro de de la Red de Terapia Celular de la Junta de Castilla y León. Pertenece al CIBER Cardiovascular del Instituto de Salud Carlos III.

El Dr. Alberto San Román, jefe de servicio ha sido el Investigador principal de los siguientes proyectos FIS del Instituto de Salud Carlos III “Receptores tipo toll en la patogénesis de la estenosis aórtica degenerativa: una nueva diana terapéutica” (FIS PI 11/00264) y “Estenosis aórtica degenerativa en pacientes asintomáticos: nuevos marcadores de alto riesgo (FIS PI 14/00022). Además, en nuestro servicio está en marcha otro proyecto FIS ISCIII PI15/01695 “Cambios clínicos, funcionales y hemodinámicos de los pacientes con insuficiencia cardiaca avanzada tratados mediante el nuevo dispositivo percutáneo de shunt interauricular V-Wave.” Del que es investigador principal el Dr. Javier López y el Dr. Amat-Santos investigador colaborador. Participamos de manera activa en el proyecto de investigación The effect of intracoronary reinfusion of bone marrow-derived mononuclear cells (BM-MNC) on all cause mortality in acute myocardial infarction. BAMI. HEALTH.2011.1.4-1: Regenerative medicine clinical trials. FP7-HEALTH-2011-twostage. Nuestro Corelab es el responsable de la inclusión de los pacientes mediante el análisis de la ecocardiografía postinfarto.

En el laboratorio de hemodinámica y cardiología estructural se realiza la sustitución valvular aórtica percutánea (TAVI) desde el año 2009, habiendo tratado el pasado año a 65 pacientes mediante dicha técnica. Mantenemos una estrecha colaboración con otros grupos nacionales e internacionales que ha dado lugar a numerosas publicaciones.

- Transcatheter Aortic Valve Implantation in Patients With Previous Mitral Prostheses. Amat-Santos IJ et al. *Rev Esp Cardiol (Engl Ed).* 2017 Feb 23. [Epub ahead of print]
- Acquired Aseptic Intracardiac Shunts Following Transcatheter Aortic Valve Replacement: A Systematic Review. Rojas P, Amat-Santos IJ, San Román JA. *JACC Cardiovasc Interv.* 2016 Dec 26;9(24):2527-2538.
- Association Between Transcatheter Aortic Valve Replacement and Subsequent Infective Endocarditis and In-Hospital Death. Regueiro A, Amat-Santos I, San Roman A, Rodés-Cabau J. *JAMA.* 2016 Sep 13;316(10):1083-92
- Therapeutic alternatives after aborted sternotomy at the time of surgical aortic valve replacement in the TAVI Era-Five centre experience and systematic

|                                         |                                       |
|-----------------------------------------|---------------------------------------|
| <i>Código protocolo: ICICOR-2017-01</i> | <i>Versión protocolo: 1.0</i>         |
| <i>EudraCT Number: 2017-002799-18</i>   | <i>Fecha protocolo: 03 Julio 2017</i> |

- review.. Castrodeza J, Amat-Santos IJ, San Román JA. Int J Cardiol. 2016 Nov 15;223:1019-1024
- Incidence, Timing, and Predictors of Valve Hemodynamic Deterioration After Transcatheter Aortic Valve Replacement: Multicenter Registry. Del Trigo M, Amat-Santos IJ, Rodés-Cabau J. J Am Coll Cardiol. 2016 Feb 16;67(6):644-55
  - Predictors and impact of myocardial injury after transcatheter aortic valve replacement: a multicenter registry. Ribeiro HB, Amat-Santos I, Del Trigo M, Rodés-Cabau J. J Am Coll Cardiol. 2015 Nov 10;66(19):2075-88
  - Infective endocarditis after transcatheter aortic valve implantation: results from a large multicenter registry. Amat-Santos IJ, Lopez J, San Roman A, Rodés-Cabau J. Circulation. 2015 May 5;131(18):1566-74
  - Prosthetic valve endocarditis after transcatheter valve replacement: a systematic review. Amat-Santos IJ, San Roman JA, Rodés-Cabau J. JACC Cardiovasc Interv. 2015 Feb;8(2):334-46.
  - Value of CT in patients undergoing self-expandable TAVR to assess outcomes of concomitant mitral regurgitation. Amat-Santos IJ, Revilla AI, San Román JA. JACC Cardiovasc Imaging. 2015 Feb;8(2):226-7

Unidad de Análisis de imágenes cardíacas del servicio de cardiología del HCU de Valladolid. Participa en numerosos proyectos de investigación destacando las publicaciones recientes "First-in-man Safety and Efficacy of the Adipose Graft Transposition Procedure (AGTP) in Patients With a Myocardial Scar. Bayes-Genis A, Revilla A, San Román JA, Gálvez-Montón C. EBioMedicine. 2016 May;7:248-54" "Coronary artery and aortic valve calcification evaluated with cardiac computed tomography in patients with chest pain: Prognostic value in clinical practice. Revilla-Orodea A, Sevilla T, Amat-Santos IJ, Cortés-Villar C, Gómez-Salvador I, San Román JA. Int J Cardiol. 2016 Sep 15;219:247-50"

## **7. HIPÓTESIS**

El bloqueo del sistema renina-angiotensina mediante la administración de ramipril en pacientes a los que se ha puesto una prótesis percutánea aórtica como tratamiento de la estenosis aórtica degenerativa severa provoca un remodelado favorable y mejora el pronóstico (disminuye los eventos cardiovasculares).

## **8. OBJETIVO**

### **8.1. OBJETIVO PRIMARIO**

Realizar un estudio aleatorizado 1:1, abierto en pacientes a los que se ha puesto una prótesis percutánea aórtica como tratamiento de la estenosis aórtica degenerativa severa y comparar los eventos cardiovasculares, que incluye muerte de causa cardíaca, ingreso por insuficiencia cardíaca e ictus, en un seguimiento de 3 años, en pacientes que han recibido tratamiento habitual más ramipril frente a pacientes que han recibido el tratamiento habitual.

### **8.2. OBJETIVOS SECUNDARIOS**

Como parte de la hipótesis de estudio, en el ensayo aleatorizado se comparará la evolución del remodelado ventricular izquierdo al año de seguimiento entre el grupo de tratamiento activo y el grupo control. Concretamente se evaluarán: Masa ventricular, fibrosis miocárdica, dimensiones ventriculares y fracción de eyección.

|                                         |                                       |
|-----------------------------------------|---------------------------------------|
| <i>Código protocolo: ICICOR-2017-01</i> | <i>Versión protocolo: 1.0</i>         |
| <i>EudraCT Number: 2017-002799-18</i>   | <i>Fecha protocolo: 03 Julio 2017</i> |

Además, se compararán otros aspectos entre el grupo de tratamiento activo y el grupo control:

- 1) Capacidad funcional al año de seguimiento
- 2) Muerte de causa cardíaca (si la causa de muerte no se conoce se considerará de causa cardíaca) al año y a los tres años del seguimiento.
- 3) Ingreso por insuficiencia cardíaca al año y a los tres años del seguimiento.
- 4) Ictus (síntomas compatibles y demostración con técnica de imagen) al año y a los tres años del seguimiento.
- 5) Muerte de cualquier causa al año y a los tres años.

## **9. DISEÑO**

Estudio de fase IV, unicéntrico, aleatorizado 1:1, abierto con asignación de eventos y estudio con RM ciegos, en pacientes a los que se coloca una PPAo por estenosis aórtica severa. Un grupo recibirá tratamiento habitual al que se añadirá ramipril. El otro recibirá el tratamiento habitual. La aleatorización se hará antes del alta, tras la firma del consentimiento informado. Incluirá 336 pacientes (168 en cada rama, ver apartado de cálculo de la muestra).

En todos los pacientes se hará un seguimiento clínico durante 3 años. En todos los pacientes se hará una RM cardíaca, un ecocardiograma y un test de los 6 minutos a los pocos días tras el procedimiento y al año para valorar el remodelado ventricular y la capacidad funcional. Se aconseja utilizar dispositivos compatibles con RM en el caso de que sean necesarios tras el procedimiento para así poder incluir a los pacientes en el estudio. Si son necesarios dispositivos una vez incluidos en el protocolo, deberán ser compatibles con RM.

### **9.1. POBLACIÓN**

Se incluirán en el estudio, pacientes mayores de 60 años de edad, reclutados en el área de hospitalización, que cumplan los siguientes requisitos: diagnóstico de estenosis aórtica severa por criterios ecocardiográficos.

### **9.2. CRITERIOS DE INCLUSIÓN**

- Sustitución de la válvula aórtica con una prótesis percutánea aceptada en una sesión médico-quirúrgica por estenosis aórtica severa.
- No tienen ningún dispositivo no compatible con RM.
- Capacidad de entender y firmar el consentimiento informado.
- No cumplen ninguno de los criterios de exclusión.

### **9.3. CRITERIOS DE EXCLUSIÓN**

- Valvulopatía mitral asociada que requiera intervención.
- Fracción de eyección ventricular izquierda menor del 40% y antecedentes de infarto de miocardio o diagnóstico previo de miocardiopatía dilatada.
- Prescripción de bloqueantes del SRA en los 3 meses previos al comienzo del estudio.
- Alergia o intolerancia conocida a los IECAs.
- Insuficiencia renal significativa (filtrado glomerular < 30 ml/min). Si está entre 30 y 50 ml/min, puede entrar en el estudio pero no se le administrará gadolinio durante la RM.
- Presión sistólica menor de 100 mmHg o diastólica menor de 40 mmHg.
- Embarazo en segundo o tercer trimestre.

|                                         |                                       |
|-----------------------------------------|---------------------------------------|
| <i>Código protocolo: ICICOR-2017-01</i> | <i>Versión protocolo: 1.0</i>         |
| <i>EudraCT Number: 2017-002799-18</i>   | <i>Fecha protocolo: 03 Julio 2017</i> |

- Participación en otro ensayo clínico.

#### **9.4. CONSENTIMIENTO INFORMADO**

Si el paciente decide participar, se entregará la hoja de información al paciente y tras leer el documento y aclarar dudas, si accede a participar en el estudio el paciente firmará el consentimiento informado.

## **10. PLAN DE ANALISIS ESTADISTICO Y TAMAÑO DE LA MUESTRA**

### **10.1. ANALISIS ESTADISTICO Y SISTEMA DE ALEATORIZACIÓN.**

Las variables categóricas se expresarán como valor absoluto y porcentaje y las continuas como media  $\pm$  desviación estándar y/o mediana e intervalo intercuartílico. Se comprobará la presunción de normalidad de las variables cuantitativas mediante el análisis de la curtosis y asimetría y el test de Kolmogorov-Smirnov. Para comparar las variables cualitativas se utilizarán el test de la  $\chi^2$  y el test exacto de Fisher cuando sea necesario. Las variables continuas se compararán mediante el test t de Student o su homólogo no paramétrico, el test U de Mann-Whitney, si no se cumple la hipótesis de normalidad. Se construirá un modelo de regresión de Cox para determinar los factores predictores de evento. No se incluirán más de 1 variable por cada 10 eventos registrados, para evitar sobreajuste. Se calcularán los Hazard ratio (HR) ajustadas para cada una de las variables incluidas y sus intervalos de confianza al 95%. Para comprobar la bondad del ajuste del modelo se verificará que los riesgos son proporcionales y se calculará el estadístico C-index. Todos los valores de p serán bilaterales. Se considerará estadísticamente significativo un valor de p inferior a 0,05. El análisis estadístico se realizará con el software SSPS V 23.0 (IBM® SPSS® Statistics). Se utilizará un sistema independiente de aleatorización fija en bloques balanceados de tamaño 4 y 6 pacientes, que serán a su vez elegidos aleatoriamente para evitar conocer el tamaño del bloque. Se utilizará el programa C4-Study desing pack (Glaxo Wellcome, v1.1). La independencia se asegurará porque el tratamiento se asignará directamente en el momento de inclusión del paciente en una base on line creada para recoger los datos de los pacientes.

### **10.2. TAMAÑO DE LA MUESTRA**

Tan solo pueden evaluarse tres estudios para calcular la muestra: Yiu KH. Int J Cardiol 2014 (referencia 22); Goel SS. Ann Intern Med 2014 (referencia 23); Dahl JS. Am J Cardiol 2010 (referencia 24). El primero tiene muchas limitaciones y no aporta suficientes datos por lo que no se ha podido valorar. El estudio de Goel SS et al incluye 1752 pacientes, es retrospectivo y sólo considera la mortalidad total como evento. Hace un análisis de propensión con 594 pacientes y la mortalidad a los 5 años es del 10% en el grupo de tratamiento activo y del 22% en el grupo control. En base a estos datos se estima un tamaño de muestra de 150 pacientes por grupo. Se ha establecido un nivel de significación del 5% (error alfa = 0,05) y una potencia del 80% (error beta = 0,20). El estudio de Dahl JS et al incluye 114 pacientes y valora la regresión de la masa ventricular al año. En el grupo de tratamiento activo la masa descendió  $30\pm 40$  gramos y en el grupo control  $12\pm 28$  gramos. En base a estos datos para un nivel de significación del 5% (error alfa = 0,05) y una potencia del 80% (error beta = 0,20), se estima un tamaño de muestra de 79 pacientes por grupo. En el estudio HOPE se describe que el ramipril fue retirado en el 7% de los pacientes por tos

|                                         |                                       |
|-----------------------------------------|---------------------------------------|
| <i>Código protocolo: ICICOR-2017-01</i> | <i>Versión protocolo: 1.0</i>         |
| <i>EudraCT Number: 2017-002799-18</i>   | <i>Fecha protocolo: 03 Julio 2017</i> |

persistente. Por tanto, en base al estudio de Goel SS et al se decide incluir 336 pacientes (300 pacientes más el 5% de posibles pérdidas y el 7% de posible retirada del fármaco) para estudiar la hipótesis de que el tratamiento con ramipril mejora la supervivencia. La RM de seguimiento para valorar la masa ventricular se plantea al año, similar al estudio de Dahl JS et al. De esa manera, se incluye la valoración de la hipótesis de que el tratamiento activo disminuye más la masa ventricular. Los resultados del estudio en el que se basa el cálculo de la muestra se dan a los 5 años de seguimiento. Dado que en nuestro estudio se incluyen otros eventos (ingreso por insuficiencia cardíaca, ingreso por arritmias malignas e ictus) se plantea un seguimiento de 3 años tras el cual se hará un análisis de los datos recogidos. En caso de que no fueran concluyentes pero se observara una tendencia se ampliaría el seguimiento a 5 años.

## **11. INTERVENCIÓN**

### **11.1. TRATAMIENTO DEL ESTUDIO**

Ramipril en dosis inicial de 2,5 mg/día hasta objetivo de 10 mg/día.

### **11.2. ADMINISTRACION DE LA MEDICACION**

Se trata de un estudio abierto. Los pacientes del grupo de tratamiento activo recibirán antes del alta 2,5 mg de ramipril. Al mes se aumentará la dosis a 5 mg y a los 3 meses a 10 mg siguiendo las recomendaciones de las guías de práctica habitual y la ficha técnica de la droga para la titulación. Si el paciente comienza con síntomas relacionados con la toma de ramipril se bajará a la dosis previa. Se dejará definitivamente la dosis máxima tolerada. Los pacientes del grupo control no podrán recibir bloqueantes del SRA durante la duración del estudio. Si el paciente que pertenece al grupo de ramipril presenta tos irritativa persistente y se descarta una causa reversible, se retirará la medicación.

En el grupo control, el objetivo de TA es que no supere 140/90 mmHg. Para ello, su médico responsable podrá añadir el fármaco que considere para controlar la TA, en caso de que sea necesario, excepto bloqueantes del SRA. A los pacientes del grupo control se les ofrecerá la posibilidad de tomar ramipril al finalizar el estudio si se demuestra su beneficio.

## **12. IMAGEN CARDÍACA**

### **12.1. ESTUDIOS DE ECOCARDIOGRAFÍA TRANSTORÁCICA**

Antes del estudio ecocardiográfico se medirán el peso y talla del paciente. Con el paciente ya tumbado y previo al inicio del estudio se recogerán la presión arterial y la frecuencia cardíaca. Se analizarán los siguientes parámetros: Parámetros de la aurícula izquierda: diámetro anteroposterior. Parámetros del ventrículo izquierdo: diámetro telediastólico; diámetro telesistólico, diámetro del tracto de salida; grosor del septo interventricular basal; grosor de la pared posterior; volumen telediastólico; volumen telesistólico; volumen latido; fracción de eyección por el métodos de Teicholz y Simpson. Parámetros de la válvula aórtica: velocidad máxima en el tracto de salida del ventrículo izquierdo; gradiente máximo y medio en el tracto de salida del ventrículo izquierdo; ITV en el tracto de salida del ventrículo izquierdo; velocidad máxima en la válvula aórtica; gradiente máximo y medio en la válvula aórtica; ITV en la válvula

|                                         |                                       |
|-----------------------------------------|---------------------------------------|
| <i>Código protocolo: ICICOR-2017-01</i> | <i>Versión protocolo: 1.0</i>         |
| <i>EudraCT Number: 2017-002799-18</i>   | <i>Fecha protocolo: 03 Julio 2017</i> |

aórtica; área valvular aórtica; insuficiencia; gravedad de la insuficiencia (I/II/III), localización de la insuficiencia (periprotésica, intraprotésica). La valoración de la gravedad de la insuficiencia tras la colocación de la TAVI se hará según los criterios VARC. Parámetros de la válvula mitral: normal; degenerativa; reumática; gravedad de la insuficiencia (I/II/III); ORE insuficiencia mitral. Parámetros de la válvula tricúspide: insuficiencia; gravedad de la insuficiencia (I/II/III); gradiente sistólico máximo ventrículo derecho-aurícula derecha. Parámetros de función diastólica: onda E; onda A; relación E/A; tiempo de desaceleración de la onda E; tiempo de relajación ventricular isovolumétrica; onda E'; onda A'.

## **12.2. ESTUDIOS DE RESONANCIA MAGNÉTICA CARDIACA**

Todos los estudios se realizarán en una máquina de 1,5 Teslas con antenas de superficie específicas para estudios cardiacos de 32 canales con sincronización electrocardiográfica y en apnea en espiración. El campo de visión se ajustará al mínimo posible en cada plano para evitar aliasing y se mantendrá similar a lo largo del estudio. Se recogerá antes de comenzar el estudio el peso y la talla del paciente. Se realizará el siguiente protocolo: 1) Localizadores en los 3 planos del espacio (axial, coronal y sagital) cubriendo el área cardiaca; 2) Estudio de función ventricular izquierda y derecha: secuencias SSFP (TrueFISP, bTFE, FIESTA): a) Se obtendrá un plano 4 cámaras (eje largo horizontal), un plano 2 cámaras (eje largo vertical) y eje corto completo (cuidando de cubrir éste completo y no acortar base o ápex, programando los cortes desde al anillo mitral al ápex en telediástole); b) 30 fases. Grosor de corte para 8 mm, GAP 0 mm. Suficiente resolución temporal (tiempo de repetición igual o menor a 35 mseg); 3) Cuantificación de la insuficiencia aórtica residual con secuencias de contraste de fase: a) dos cortes, uno a nivel de la raíz de la aorta y otro en aorta ascendente; b) grosor de corte 8 mm; c) ajuste de la codificación de velocidad lo más bajo posible evitando aliasing. 4) Estudio de realce tardío con secuencias inversión-recuperación (tras la administración de un bolo de 0.2 mmol/kg de gadolinio); a) Se iniciará a partir de los 10 minutos de la perfusión; b) Se obtendrá un plano 4 cámaras, un plano 2 cámaras y todo el eje corto. Se copiará la programación del estudio de cine para que los cortes realizados sean similares; c) Grosor de corte 8 mm, GAP 0.

Se analizarán los siguientes parámetros: Volumen telediastólico del ventrículo izquierdo (ml/m<sup>2</sup>); Volumen telesistólico del ventrículo izquierdo (ml/m<sup>2</sup>); Volumen latido del ventrículo izquierdo (ml); Fracción de eyección del ventrículo izquierdo (%); Masa cardiaca (g/m<sup>2</sup>); Grososores parietales segmentarios (mm); Volumen telediastólico del ventrículo derecho (ml/m<sup>2</sup>); Volumen telesistólico del ventrículo derecho (ml/m<sup>2</sup>); Volumen latido del ventrículo derecho (ml); Fracción de eyección del ventrículo derecho (%); Parámetros de deformación miocárdica: strain, strain rate, desplazamiento, velocidad, torsión y torsión rate; Ecc, Err, Ell y torsión; Presencia y grado de insuficiencia aórtica residual (volumen regurgitante, ml; fracción regurgitante, %); Presencia y grado de fibrosis miocárdica: localización por segmentos, disposición (subendocárdica, subepicárdica, intramiocárdica), total masa fibrótica (gramos totales de fibrosis miocárdica y % de la masa total del VI).

## **12.3. ANALISIS DE LOS PARAMETROS DE IMAGEN**

El análisis cuantitativo de todos los parámetros de la RM será llevado a cabo por expertos, que no conocerán los datos de los pacientes, en el laboratorio de imagen cardiaca del Servicio de Cardiología del Hospital Clínico Universitario de Valladolid, con certificado de calidad emitido por la empresa AENOR que evidencia la conformidad del Sistema de Gestión de la Calidad en base a la norma UNE-EN ISO 9001:2008.

|                                         |                                       |
|-----------------------------------------|---------------------------------------|
| <i>Código protocolo: ICICOR-2017-01</i> | <i>Versión protocolo: 1.0</i>         |
| <i>EudraCT Number: 2017-002799-18</i>   | <i>Fecha protocolo: 03 Julio 2017</i> |

## **13. SEGUIMIENTO DE LOS PACIENTES**

### **13.1. VALORACIÓN INICIAL DEL PACIENTE**

Se hará una visita inicial de inclusión en la que el paciente si es candidato, cumple con los criterios de inclusión y ninguno de exclusión, tras ser informado, si acepta firmará el consentimiento informado.

Se registrarán los siguientes datos:

- Parámetros clínicos: edad, sexo, talla, peso, índice de masa corporal, superficie corporal, factores de riesgo cardiovascular, toma de medicamentos, antecedentes de interés, historia de cardiopatía, presencia de cardiopatía isquémica, accidente cerebrovascular, arteriopatía periférica, enfermedad pulmonar obstructiva crónica, síntomas (ángor, síncope, disnea según grados de la NYHA, otros síntomas), presión arterial, frecuencia cardíaca, signos de insuficiencia cardíaca, cuestionario de calidad de vida, valoración de la fragilidad.
- Parámetros del ECG: Ritmo, marcapasos, desfibrilador automático implantable, duración del QRS.
- Parámetros analíticos: hematocrito, NT-proBNP, Troponina T US, electrolitos, proteína C reactiva, creatinina, filtrado glomerular.
- Prueba de los 6 minutos: A todos los pacientes del estudio se les realizará un test de los 6 minutos antes del alta hospitalaria y al año de seguimiento para realizar una valoración funcional objetiva de la capacidad funcional. Se determinará la distancia recorrida, la variación de la saturación de oxígeno mediante pulsioximetría no invasiva antes y después del test y la aparición de síntomas con el esfuerzo según la escala de Borg.

Se valorará la posibilidad de realización de subestudios, lo cual se comunicará mediante los medios correspondientes.

### **13.2. SEGUIMIENTO CLINICO Y DE IMAGEN**

Lo realizaremos antes del alta, en consulta a los tres, seis y 12 meses y de manera presencial o telefónica a los tres años. Según los resultados obtenidos en el subanálisis a realizarse con datos del seguimiento al año, puede prolongarse a cinco años. Todas las visitas poseen un período de ventana para realizarse junto con las pruebas complementarias de este protocolo, de una semana antes y una semana después de la fecha correspondiente.

Una vez asignado el tratamiento del estudio se les realizará una: (Ver anexo II)

Visita Inicial (Visita Basal).

- Evaluación de la historia clínica del paciente.
- Evaluación física detallada del paciente.
- Realización de electrocardiograma.
- Analítica.
- Estudio basal ecocardiográfico.
- Realización de prueba de los 6 minutos.
- Estudio con resonancia magnética cardíaca.

Visita de seguimiento a los 3 meses (más/menos una semana)

- Evaluación clínica.
- Analítica.
- Evaluación de eventos.

Visita de seguimiento a los 6 meses (más/menos una semana)

|                                         |                                       |
|-----------------------------------------|---------------------------------------|
| <i>Código protocolo: ICICOR-2017-01</i> | <i>Versión protocolo: 1.0</i>         |
| <i>EudraCT Number: 2017-002799-18</i>   | <i>Fecha protocolo: 03 Julio 2017</i> |

- Evaluación clínica.
- Analítica.
- Evaluación de eventos.

Visita de seguimiento a los 12 meses (más/menos una semana)

- Evaluación clínica.
- Realización de electrocardiograma.
- Analítica.
- Estudio ecocardiográfico.
- Realización de prueba de los 6 minutos.
- Estudio con resonancia magnética cardiaca.
- Evaluación de eventos.

Visita de seguimiento a los 36 meses (más/menos una semana) – puede ser telefónica

- Evaluación clínica.
- Analítica.
- Estudio ecocardiográfico.
- Evaluación de eventos.

Todos los pacientes incluidos en el estudio entrarán en un protocolo de seguimiento con objeto de obtener información actualizada sobre su estatus vital (ver cronograma el estudio).

El tratamiento se prolongará mientras el sujeto continúe participando en el estudio. Tras su finalización, dependiendo de los resultados del mismo y de la literatura accesible en ese momento se decidirá que fármaco debe continuar tomando, o la discontinuación del mismo.

Las imágenes obtenidas en las ecocardiografías y en las RM serán analizadas por el Core Lab (ICICORELAB) para su análisis centralizado. Dicho investigador será ciego en cuanto al tratamiento recibido de los pacientes. Los datos clínicos y de imagen se introducirán en una base de datos, se realizará el análisis estadístico y se reportaran los resultados.

### **13.3. ASIGNACION DE EVENTOS**

Los eventos cardiovasculares (muerte de causa cardíaca, ingreso por insuficiencia cardíaca, ictus) serán asignados por un comité de eventos formado por profesionales (1 cardiólogo clínico, 1 hemodinamista, 1 neurólogo) que no conocerán el grupo al que pertenece el paciente (tratamiento activo con ramipril, grupo control).

### **13.4. ABANDONO DEL ESTUDIO**

A) Abandono del estudio de un paciente porque retira su consentimiento.

B) Abandono del estudio debido a:

- a) se revelan criterios de exclusión tras la inclusión en el estudio
- b) aparece un nuevo evento clínico grave durante la participación en el estudio que contraindique la realización de resonancias u otras pruebas necesarias
- c) el equipo médico decide la necesidad de incluir al paciente en cuidados paliativos

## **14. PLAN DE TRABAJO**

El Dr. San Román (ASR) es el investigador principal del estudio y coordinador del mismo; es responsable de la concepción, elaboración y redacción de este protocolo.

Selección de pacientes y visita basal: El Dr Amat-Santos (AS), será el responsable de la selección de pacientes a participar en el proyecto, contará con la colaboración del Dr. di Stefano (SS). Tras explicarle al paciente las características del estudio,

|                                         |                                       |
|-----------------------------------------|---------------------------------------|
| <i>Código protocolo: ICICOR-2017-01</i> | <i>Versión protocolo: 1.0</i>         |
| <i>EudraCT Number: 2017-002799-18</i>   | <i>Fecha protocolo: 03 Julio 2017</i> |

solicitarán la firma del consentimiento informado del mismo y se pedirán las pruebas complementarias necesarias de la vista basal.

Ecocardiograma basal y de seguimiento al año: El responsable será el Dr. Román Arnold (RA), los estudios serán grabados en formato DICOM y analizados en el centro. Visita de inicio, programación y realización de pruebas de las visitas clínicas al alta, mes, tres meses y doce meses: Bajo la supervisión del Dr. Luis Varela-Falcón (LV) el encargado será el Dr. Silvio Vera (SV).

Realización de Resonancias Cardíacas antes del alta y a los doce meses: La responsable de la realización de las pruebas será la Dra. Sevilla (TS).

Introducción de los datos en el cuaderno de recogida de datos electrónico: En nuestro centro, bajo la supervisión del Dr. Amat-Santos, el Dr. di Stefano (SS) será el responsable de dicha tarea.

Coordinación del estudio: El Dr. San Román mantendrá un contacto mensual con el resto de investigadores. La finalidad de esta interlocución será estimular la inclusión y detectar aquellos problemas que surjan en el desarrollo del estudio para solucionarlos elaborando enmiendas que de ser necesario se presentaran a la AEMPS y al CEIC de referencia en el Hospital Clínico universitario de Valladolid.

Análisis finales y difusión de los resultados: todo el equipo investigador participará en la elaboración de resúmenes y manuscritos describiendo los resultados, que se enviarán a los congresos y revistas internacionales y nacionales más importantes en Cardiología bajo el consejo del estadístico Itziar Gómez (IG).

## **15. GESTIÓN DE DATOS**

### **15.1. RECOGIDA DE DATOS:**

Todos los pacientes con colocación de PPAo recibirán tratamiento habitual según las guías de práctica clínica y consensos vigentes. Se evaluará en todos ellos los criterios de inclusión/exclusión para confirmar la factibilidad de entrar en el presente estudio, el cual se ofrecerá, explicará y posteriormente recogerá el consentimiento informado correspondiente. Posteriormente, Siguiendo el protocolo predeterminado se recogerán una serie de variables epidemiológicas, clínicas, de laboratorio, electrocardiográficas, ecocardiográficas, funcionales y de resonancia magnética basales del paciente, antes del alta. Todas previamente detalladas.

Todos los datos serán recogidos en el CRD, que está concebido para registrar todos los datos requeridos en el protocolo y recogidos por el investigador. La entrada de datos la realizará el investigador o la persona que éste designe, y posteriormente se transmitirán esos datos hasta la base de datos del estudio.

El investigador o la persona de su equipo designada por éste se compromete a completar el CRD en cada visita realizada por el participante, así como cualquier otro documento entregado por el promotor (documentos relacionados con la gestión de tratamientos, etc).

Todas las correcciones de los datos del CRD se realizarán por el investigador o por la persona de su equipo que haya designado, de acuerdo con las instrucciones dadas. El monitor deberá asegurarse de que todos los datos del CRD están completos. Se requerirán datos originales para todos los datos registrados en el CRD.

Después de confrontar los datos del cuaderno con los documentos fuente, el monitor solicitará las aclaraciones pertinentes.

Después de la última visita del participante y tras el cierre del CRD, el investigador debe atestar, firmando el CRD, la autenticidad de los datos recogidos en el CRD, y la coherencia entre los datos del CRD y los datos contenidos en los documentos fuente.

|                                         |                                       |
|-----------------------------------------|---------------------------------------|
| <i>Código protocolo: ICICOR-2017-01</i> | <i>Versión protocolo: 1.0</i>         |
| <i>EudraCT Number: 2017-002799-18</i>   | <i>Fecha protocolo: 03 Julio 2017</i> |

## **15.2. GESTIÓN DE DATOS**

El departamento de gestión de datos se responsabiliza del procesamiento de todos los datos que incluye una: validación de datos que se realizará siguiendo un manual específico en el que se describen los controles a realizar. Como resultado de la validación, algunos datos pueden requerir modificaciones. En ese caso se prepara una ficha de corrección/aclaración de datos: Query, que se envía al investigador para que lo confirme, o lo corrija y firme.

Transferencia de datos electrónicos a la base de datos de acuerdo con el protocolo de transferencia del promotor.

## **15.3. CONFIDENCIALIDAD DE LOS DATOS**

Todos los documentos y la información entregados al investigador por el promotor con respecto al estudio son estrictamente confidenciales.

Tanto el investigador como sus colaboradores se comprometen a utilizar la información facilitada únicamente en el marco de este estudio, para llevar a cabo este protocolo. Este compromiso se mantiene en tanto en cuanto las informaciones confidenciales no se hayan hecho públicas por el promotor. El protocolo entregado al investigador puede ser utilizado por él o sus colaboradores para obtener el consentimiento informado de los participantes que entren en el estudio. No debe ser divulgado a terceras personas sin la autorización escrita del promotor.

El investigador rellenará y conservará una lista de sujetos preseleccionados (lista de screening) y susceptibles de entrar en el estudio así como una lista de identificación y de inclusión de cada participante, con la identificación completa de cada uno de ellos.

Asimismo, se compromete a facilitar estas listas al auditor y/o a las Autoridades Reguladoras. Esta información se tratará según las normas del secreto profesional. La lista de screening debe ser completada en el momento en el que el investigador verifique que el participante podría entrar en el estudio, tras confirmar sus antecedentes en una visita o evaluar su historia médica.

# **16. EVALUACIONES DE SEGURIDAD**

## **16.1. MEDICIONES DE SEGURIDAD**

Se realizarán mediciones de seguridad en cada visita. Los investigadores recogerán los datos requeridos para las evaluaciones de seguridad. Esto incluye:

- Documentación de los antecedentes médicos relevantes en la visita de selección y la aparición de acontecimientos adversos en el periodo entre visitas (en cada visita).
- Registro de hallazgos anormales obtenidos durante los exámenes físicos.

El investigador recogerá e interpretará la información y decidirá la comunicación de cualquier hallazgo normal como acontecimiento adverso, si fuera necesario. Cualquier evolución desfavorable relevante y significativa observada con respecto al examen basal se comunicará como acontecimiento adverso.

## **16.2. ACONTECIMIENTOS ADVERSOS**

Todos los acontecimientos adversos deben ser seguidos y documentados de forma precisa y completa con el fin de evaluar la seguridad de la medicación en estudio.

## **DEFINICIÓN DE ACONTECIMIENTOS ADVERSOS**

Es cualquier suceso médico no deseado que se da en un sujeto o sujeto participante en una investigación clínica y al que se le administra un producto farmacéutico, y que no necesariamente debe tener una relación causal con dicho tratamiento.

|                                         |                                       |
|-----------------------------------------|---------------------------------------|
| <i>Código protocolo: ICICOR-2017-01</i> | <i>Versión protocolo: 1.0</i>         |
| <i>EudraCT Number: 2017-002799-18</i>   | <i>Fecha protocolo: 03 Julio 2017</i> |

Un acontecimiento adverso puede ser, por tanto, cualquier signo (incluyendo anomalías de laboratorio, por ejemplo), síntoma o enfermedad desfavorables y no intencionados temporalmente asociados con la utilización de un producto terapéutico (en investigación), se considere o no relacionado con el producto terapéutico (en investigación). Durante el estudio, los acontecimientos adversos pueden producirse también fuera del periodo en que se administre el producto en investigación, por ejemplo, durante los periodos de lavado.

Las enfermedades previas no se consideran acontecimientos adversos, salvo que se modifique su gravedad, frecuencia o calidad.

El diagnóstico reciente de embarazo no se considera en si mismo un acontecimiento adverso, salvo la sospecha de interferencia del producto en investigación con un método anticonceptivo o la existencia de alguna relación con el embarazo. Toda anomalía congénita secundaria a ese embarazo se clasificara como acontecimiento adverso grave. Así pues, todos los embarazos deben reseñarse en un impreso de comunicación de embarazo con toda la información disponible, y deben seguirse hasta un mínimo de 3 meses después del parto para determinar su evolución.

### **ACONTECIMIENTOS ADVERSOS GRAVES**

Un acontecimiento (episodio) adverso grave es cualquier suceso medico no deseado que a cualquier dosis:

- Produce la muerte
- Amenaza la vida,
- Da lugar a la hospitalización o prolonga la hospitalización del sujeto,
- Da lugar a una discapacidad/incapacidad persistente o significativa o
- Es una anomalía congénita/defecto de nacimiento

El juicio medico y científico determinara si deben considerarse graves otras situaciones, cuando sea oportuno, como los acontecimientos médicos importantes que, sin ser potencialmente mortales de forma inmediata ni provocar la muerte o un ingreso, pongan en peligro al paciente o precisen una intervención para impedir uno de los puntos citados en la definición anterior.

Como ejemplo pueden citarse la necesidad de tratamiento en urgencias o ambulatorio de una reacción alérgica, cefalea o hipotensión refractaria.

Las hospitalizaciones en el periodo del estudio, programadas previamente (.ej. procedimientos quirúrgicos optativos) no se consideraran acontecimientos adversos graves.

### **DEFINICIÓN DE REACCIÓN ADVERSA**

En el contexto de la experiencia clínica, previa a la aprobación, con un nuevo producto terapéutico o con sus nuevas indicaciones: respuestas nocivas y no intencionadas a un producto terapéutico relacionadas con cualquier dosis deberán considerarse reacciones adversas a un fármaco. La respuesta a un producto terapéutico significa que la relación de causalidad entre un producto terapéutico y un acontecimiento adverso es al menos, una posibilidad razonable, esto es, la relación no se puede excluir.

### **DEFINICIÓN DE ESPERABLE**

Se entiende por acontecimiento adverso inesperado aquel cuya naturaleza o intensidad no son compatibles con la información contenida en la documentación original pertinente. El Manual del Investigador (MI) servirá como documento original principal.

Además, constituyen acontecimientos inesperados los informes que añadan información significativa sobre la especificidad o intensidad de una reacción adversa conocida. Por ejemplo, se consideraría “inesperado” un acontecimiento más específico o más intenso de lo descrito en el Manual del Investigador.

|                                         |                                       |
|-----------------------------------------|---------------------------------------|
| <i>Código protocolo: ICICOR-2017-01</i> | <i>Versión protocolo: 1.0</i>         |
| <i>EudraCT Number: 2017-002799-18</i>   | <i>Fecha protocolo: 03 Julio 2017</i> |

## **INCIDENCIA Y DURACIÓN**

Desde el punto de vista de la “incidencia”, se distingue según que el acontecimiento ocurra:

- Una vez: se aplica al acontecimiento que ocurre una sola vez o es continuo, sin interrupción.
- Intermitente: se aplica al acontecimiento adverso que se produce de forma reiterada, con un intervalo de menos de 24 horas entre los episodios.

Desde el punto de vista de la “duración” de un acontecimiento, esta se mide como:

- Un periodo de días, horas o minutos o continuo (el acontecimiento sigue presente al concluir el estudio).

## **MEDIDAS ADOPTADAS**

Desde el punto de vista de las “medidas adoptadas”, se distingue entre:

- Ninguna: no se adoptó ninguna medida.
- Nueva medicación: se prescribió una nueva medicación o se cambió la dosis de una medicación existente (debe incluirse en la tabla de medicación) para contrarrestar el acontecimiento.
- Suspensión del estudio: se suspendió la participación del paciente en el estudio por el acontecimiento adverso.
- Otras: fueron precisas otras medidas, como cirugía.

## **DEFINICIÓN DE INTENSIDAD/ GRAVEDAD**

Desde el punto de vista de la “intensidad” clínica de un acontecimiento adverso, se distingue entre:

- Leve: Los signos y síntomas pueden tolerarse fácilmente cuando el sujeto está distraído, puede pasar por alto los síntomas y estos desaparecer.
- Moderada: Los síntomas causan malestar pero son tolerables; no pueden pasarse por alto y alteran la concentración del sujeto.
- Intensa: Los síntomas condicionan/limitan la actividad normal diaria.

## **CRITERIOS DE CAUSALIDAD**

Para clasificar la relación de un acontecimiento adverso con el producto en investigación se aplicaran los criterios publicados por Edwards y Biriell, del Centro Colaborador para la Vigilancia Farmacológica Internacional de la Organización Mundial de la Salud (1994), y Schosser y Quast (1998):

- Condicional/ no clasificado: acontecimiento clínico, incluidas las alteraciones de una prueba de laboratorio, notificado como reacción adversa, en relación con el cual se necesitan más datos para una evaluación adecuada o para el que hay datos adicionales en estudio.
- No evaluable/ inclasificable: reacción adversa, que no puede juzgarse, por información insuficiente o contradictoria no ampliable ni comprobable.
- No relacionado: acontecimiento clínico, incluidas las alteraciones de una prueba de laboratorio, respecto al cual hay indicios suficientes para aceptar que no tiene una relación causal con la administración del fármaco (por ejemplo, no existe relación temporal con la administración del fármaco, dado que esta tuvo lugar después del comienzo del acontecimiento; la investigación demuestra que no se administró el fármaco; se ha comprobado que hay otra causa, etc.).
- Improbablemente relacionado: acontecimiento clínico, incluidas las alteraciones de una prueba de laboratorio, cuya relación temporal con el fármaco hace improbable una relación causal, habiendo otros fármacos, compuestos químicos o enfermedad subyacente que aportan explicaciones verosímiles.

|                                         |                                       |
|-----------------------------------------|---------------------------------------|
| <i>Código protocolo: ICICOR-2017-01</i> | <i>Versión protocolo: 1.0</i>         |
| <i>EudraCT Number: 2017-002799-18</i>   | <i>Fecha protocolo: 03 Julio 2017</i> |

- Posiblemente relacionado: acontecimiento adverso, incluidas las alteraciones de una prueba de laboratorio, respecto al cual se observa una secuencia temporal razonable con la administración del fármaco, aunque también puede justificarse por una enfermedad concomitante o por otros fármacos o compuestos químicos. La información sobre la suspensión del fármaco puede estar ausente o desconocerse.
- Probablemente relacionado: acontecimiento adverso, incluidas las alteraciones de una prueba de laboratorio, respecto al cual se observa una secuencia temporal razonable con la administración del fármaco y una relación improbable con una enfermedad concomitante u otros fármacos o compuestos químicos, y que presenta una respuesta adecuada desde el punto de vista clínico a la suspensión del fármaco (suspensión del estímulo). No se precisa información sobre la nueva exposición al estímulo para cumplir la definición.
- Definitivamente relacionado: acontecimiento adverso, incluidas las alteraciones de una prueba de laboratorio, que presenta una relación temporal admisible con la administración del fármaco y que no puede explicarse por ninguna enfermedad concomitante ni otros fármacos ni compuestos químicos. La respuesta a la suspensión del fármaco (suspensión del estímulo) debe ser verosímil desde el punto de vista clínico. El acontecimiento debe ser concreto desde el punto de vista farmacológico o fenomenológico, con un procedimiento adecuado de exposición al estímulo en caso necesario.

#### **DEFINICIÓN DEL RESULTADO EN EL MOMENTO DE LA ÚLTIMA OBSERVACIÓN**

El resultado en el momento de la última observación se clasificara distinguiendo entre:

- Resuelto
- En resolución
- No resuelto
- Resuelto con secuelas
- Mortal
- Desconocido

En el supuesto de anomalías congénitas irreversibles, deberá emplearse el término 'no resuelto', '**Mortal**' se reservara solo para el supuesto en que la muerte esté posiblemente relacionada con el acontecimiento adverso (nota: la relación causal del producto en investigación con el acontecimiento adverso no se tendrá en cuenta para esta decisión). En caso de que haya más de un acontecimiento adverso, solo el que haya producido la muerte (posiblemente relacionado) se considerara '**mortal**'.

#### **PROCEDIMIENTOS DE RECOGIDA Y NOTIFICACIÓN**

##### **DOCUMENTACIÓN DE LOS ACONTECIMIENTOS ADVERSOS**

Los acontecimientos adversos se seguirán de forma continuada o se indagaran en cada visita. La incidencia de todos los acontecimientos adversos se reseñará en el cuaderno de recogida de datos, y se adjuntara la siguiente información cuando sea oportuno:

- Naturaleza del acontecimiento adverso
- Si el acontecimiento adverso se ha producido por primera vez
- Si el acontecimiento se ha producido una vez o es intermitente
- Si el acontecimiento adverso era esperado
- Si el acontecimiento adverso fue grave
- Intensidad del acontecimiento adverso
- Periodo en que persistió el acontecimiento adverso
- Medidas adoptadas
- Resultado
- Relación con el producto en investigación

|                                         |                                       |
|-----------------------------------------|---------------------------------------|
| <i>Código protocolo: ICICOR-2017-01</i> | <i>Versión protocolo: 1.0</i>         |
| <i>EudraCT Number: 2017-002799-18</i>   | <i>Fecha protocolo: 03 Julio 2017</i> |

## **SEGUIMIENTO DE LOS PACIENTES CON ACONTECIMIENTOS ADVERSOS**

Cualquier acontecimiento adverso o resultado de laboratorio anormal considerado significativo desde el punto de vista clínico se seguirá hasta que se resuelva de forma satisfactoria, se establezca o pueda explicarse por otras causas (es decir, enfermedad o medicación concomitante) y el juicio clínico estime innecesario otros estudios. Todos los resultados deben reseñarse en la historia clínica del paciente.

## **PROCEDIMIENTOS ESPECIALES ANTE ACONTECIMIENTOS ADVERSOS GRAVES Y COMPLICACIONES**

Cuando las complicaciones o los acontecimientos no sean tolerables, queda a criterio del investigador detener el estudio o tratar al paciente.

Clasificación de la acción emprendida cuando se produce un acontecimiento adverso:

- Mantenimiento del producto en investigación
- Reducción del producto en investigación
- Suspensión del producto en investigación
- Acontecimiento adverso tratado con medicación o con otra opción terapéutica
- Cambio/ no cambio de la medicación concomitante
- Apertura del sobre codificado

## **COMUNICACIÓN DE ACONTECIMIENTOS ADVERSOS**

Los acontecimientos adversos graves (como el fallecimiento, independientemente de su causa) y los acontecimientos adversos que produzcan la suspensión prematura durante el estudio, independientemente de la relación con el producto en investigación, deben notificarse lo antes posible, antes de 24 horas tras tener conocimiento de ellos. También deberán notificarse las reacciones adversas inesperadas y no graves que estén al menos posiblemente relacionadas con la administración del producto en investigación. Esta notificación deberá realizarse a:

José Alberto San Román Calvar  
Servicio de Cardiología, Hospital Clínico Universitario de Valladolid  
Fax número: +34983255305

En la primera notificación de un acontecimiento adverso que cumpla los criterios anteriores se comunicara la siguiente información:

- Numero del paciente
- Fecha de nacimiento del paciente
- Sexo del paciente
- Momento y fecha del comienzo del producto en investigación
- Momento y fecha de suspensión del producto en investigación
- Acontecimiento adverso (diagnostico específico)
- Momento y fecha de incidencia del acontecimiento
- Breve descripción del acontecimiento y medidas adoptadas
- Intensidad
- Criterios de gravedad
- Resultado
- Medicación concomitante al comienzo del acontecimiento
- Historia del acontecimiento
- Opinión del investigador sobre la relación con el producto en investigación

Se solicitará al investigador que remita un informe en que se describan el acontecimiento, el tratamiento instaurado y los procedimientos diagnósticos realizados. Debe comunicarse sin demora toda la información adicional sobre el acontecimiento adverso hasta la finalización del estudio o un resultado definitivo, en un informe de seguimiento.

|                                         |                                       |
|-----------------------------------------|---------------------------------------|
| <i>Código protocolo: ICICOR-2017-01</i> | <i>Versión protocolo: 1.0</i>         |
| <i>EudraCT Number: 2017-002799-18</i>   | <i>Fecha protocolo: 03 Julio 2017</i> |

El informe inmediato y los de seguimiento deben identificarse con el número exclusivo de cada paciente pero no con el nombre ni la dirección del paciente.

El investigador está obligado a cumplir con los reglamentos de comunicación de acontecimientos adversos graves a las autoridades reguladoras y al comité ético.

La notificación a las Autoridades Sanitarias será responsabilidad del promotor del estudio.

### **CONSEJO PARA MUJERES EN EDAD FÉRTIL**

No se recomienda el uso de ramipril durante el primer trimestre del embarazo y está contraindicado durante el segundo y tercer trimestres del embarazo.

La evidencia epidemiológica sobre el riesgo de teratogenicidad tras la exposición a los IECA durante el primer trimestre del embarazo no ha sido concluyente; no obstante no se puede excluir un pequeño aumento del riesgo.

Cuando se diagnostique un embarazo, debe interrumpirse inmediatamente el tratamiento con los IECA, y, si procede, iniciarse un tratamiento alternativo.

Se sabe que la exposición a IECA durante el segundo y tercer trimestres del embarazo, induce fetotoxicidad humana (disminución en la función renal, oligohidramnios, retraso en la osificación craneal) y toxicidad neonatal (fallo renal, hipotensión, hiperpotasemia). Si se produce una exposición al IECA a partir del segundo trimestre del embarazo, se recomienda realizar una prueba de ultrasonidos de la función renal y del cráneo.

### **USO DURANTE LA LACTANCIA**

Dado que la información acerca del uso del ramipril durante el periodo de lactancia no es suficiente, no se recomienda este medicamento en esa situación. Se aconsejará a las mujeres que, en caso de sospecha de embarazo, se pongan inmediatamente en contacto con el investigador o con su equipo.

### **RESPONSABILIDADES DEL INVESTIGADOR EN ACONTECIMIENTOS ADVERSOS**

#### **MÉTODOS DE RECOGIDA**

Los acontecimientos adversos deben ser documentados en la historia clínica del paciente y en el formulario de "Acontecimientos adversos" del CRD de acuerdo con las instrucciones generales para completarlo que se incluyen en el CRD.

Ciertas secciones de la página de acontecimientos adversos deben completarse sistemáticamente, independientemente de si el acontecimiento adverso requiere o no notificación inmediata. Las demás secciones sólo se completarán cuando el acontecimiento requiera notificación inmediata.

El investigador deberá documentar la fecha de comienzo, las medidas adoptadas, la evolución y el momento de desaparición o estabilización del acontecimiento. Deberá evaluar el acontecimiento en términos de causalidad, intensidad y gravedad y, en lo posible, deberá establecer un diagnóstico médico y anotarlo en el CRD.

#### **SEGUIMIENTO DE ACONTECIMIENTOS ADVERSOS**

El investigador debe asegurarse que el seguimiento del participante se adapte a la naturaleza del acontecimiento, y que continúe hasta su resolución. Debe informar inmediatamente al promotor de cualquier empeoramiento posterior que pudiera aparecer.

Cualquier cambio en términos de diagnóstico, intensidad, gravedad, medidas tomadas, causalidad o evolución relacionados con un acontecimiento adverso ya descrito, debe ser objeto de una nueva y completa evaluación del acontecimiento que debe documentarse en la página de Acontecimientos adversos del CRD.

|                                         |                                       |
|-----------------------------------------|---------------------------------------|
| <i>Código protocolo: ICICOR-2017-01</i> | <i>Versión protocolo: 1.0</i>         |
| <i>EudraCT Number: 2017-002799-18</i>   | <i>Fecha protocolo: 03 Julio 2017</i> |

Si el acontecimiento adverso no se ha resuelto o estabilizado en la visita final de estudio del participante, éste debe ser seguido adecuadamente y cualquier información que se obtenga sobre la evolución del acontecimiento se anotará en la página de “Acontecimientos adversos” del CRD. Si fuera necesario, la información se recogería con posterioridad, cuando se haya resuelto o estabilizado el estado clínico del paciente. Si el seguimiento del participante no es realizado por el propio investigador (caso seguimiento por un especialista o por el médico de familia...), el investigador hará todo lo posible para establecer / mantener contacto con la persona / institución encargados del seguimiento del participante con el fin de obtener información adicional y registrarla en la página de “Acontecimientos adversos” del CRD.

### **PROCEDIMIENTO A SEGUIR PARA LOS ACONTECIMIENTOS QUE REQUIERAN NOTIFICACIÓN INMEDIATA**

En caso de acontecimiento adverso que requiera notificación inmediata y que ocurra:

- Durante el estudio, o,
- Durante los 30 días naturales que siguen a la última visita realizada por el participante al margen de la posible relación que pueda tener con la investigación (medicación en estudio o pruebas experimentales requeridas por el protocolo técnico) o,
- A partir de estos 30 días, e independientemente del momento en el que aparezca una vez terminado el estudio, si el acontecimiento es susceptible de deberse a la investigación.

El investigador debe:

- **Anotar en la historia médica del participante** la fecha en la que fue informado del acontecimiento (en una visita de seguimiento o mediante contacto telefónico con el participante o una tercera persona...),
- **Completar inmediatamente** después de haber sido informado de este acontecimiento, **una página de “Acontecimiento adverso” del CRD**, siguiendo las instrucciones disponibles en el CRD, sin esperar a los resultados de la evolución clínica o de pruebas adicionales. Los datos deben ser enviados en las siguientes 24 horas al monitor y al promotor.
- Si el CRD no estuviese disponible cuando el investigador tenga conocimiento del acontecimiento, éste deberá:
  - Informar de inmediato por teléfono o por fax a la persona responsable de su estructura de monitorización.
  - Completar **inmediatamente una página de “Acontecimiento adverso” del CRD** y enviarla por fax a la persona responsable de su estructura de monitorización.
- **Proporcionar a la persona designada de su estructura de monitorización, tan pronto como estén disponibles, copias anonimizadas de los documentos que aporten información adicional útil**, como por ejemplo un informe de hospitalización, informes de consultas posteriores, informes de pruebas de laboratorio, o de otras pruebas que ayuden a establecer el diagnóstico, (cuando sea posible, deben adjuntarse también los resultados de las pruebas realizadas antes del tratamiento para poder compararlas con los resultados obtenidos bajo tratamiento), informe de autopsia (si se realiza),
- **Cumplir con los requisitos reglamentarios** hacia las Autoridades y/o Comité Ético de Investigación Clínica, establecidos en la normativa vigente.

### **RESPONSABILIDADES DEL PROMOTOR**

Independientemente de las obligaciones reglamentarias del investigador, el promotor debe comunicar los datos de farmacovigilancia a las Autoridades competentes y a

|                                         |                                       |
|-----------------------------------------|---------------------------------------|
| <i>Código protocolo: ICICOR-2017-01</i> | <i>Versión protocolo: 1.0</i>         |
| <i>EudraCT Number: 2017-002799-18</i>   | <i>Fecha protocolo: 03 Julio 2017</i> |

todos los investigadores implicados, de acuerdo con los requisitos establecidos en las normas ICH de Buena Práctica Clínica y en la legislación local vigente.

## **17. CONSIDERACIONES REGULATORIAS Y ÉTICAS**

### **CONSIDERACIONES REGULATORIAS**

Este estudio se llevará a cabo de conformidad con los principios éticos establecidos en la versión más reciente de la Declaración de Helsinki y las guías de buenas prácticas clínicas, lo que representa la mayor protección del individuo.

Dentro del marco de la legislación española vigente, según Real Decreto 1090/2015 del 4 de diciembre de 2015, el presente estudio se trata de un ensayo clínico de bajo nivel de intervención, dado que el medicamento de investigación está autorizado (Ver documento del investigador con ficha técnica de ramipril), se utiliza de conformidad con los términos de la autorización de comercialización y su uso se basa en pruebas y datos científicos publicados (anteriormente citados) sobre la seguridad y eficacia; Además, coincide que los procedimientos complementarios de diagnóstico o seguimiento entrañan un riesgo o carga adicional mínimo para la seguridad de los sujetos comparado con la práctica clínica habitual.

### **REVISIÓN ÉTICA**

Este protocolo tiene la aprobación del Comité de Ética del Hospital Clínico Universitario de Valladolid.

### **CONFIDENCIALIDAD**

Todos los registros y datos médicos están bajo discreción profesional y se mantendrán de forma confidencial. Los datos se organizarán, gestionarán y almacenarán en una base de datos y sólo los miembros del equipo de estudio y el comité de ética podrán acceder a ellos. Los datos no serán enviados a través de Internet a menos que se anonimicen.

### **CONSENTIMIENTO INFORMADO**

Para participar en el estudio, los pacientes deberán dar un consentimiento informado por escrito. En él, se especifica el uso de sus datos para fines científicos. El documento de consentimiento informado se utilizará para explicar en términos simples, el objetivo del estudio y sus procedimientos. El documento de consentimiento informado contiene una declaración de que el consentimiento se da libremente, y especifica que el paciente es libre de retirarse del estudio en cualquier momento. (Ver Anexo I)

### **Definición y presentación de informes sobre eventos adversos**

Se registrarán e informarán los siguientes eventos predefinidos que ocurran durante el estudio:

- Eventos adversos (AE)
- Eventos adversos graves (SAE)

### **Definición de eventos adversos de acuerdo a la Conferencia de Armonización Internacional (ICH)**

Un **evento adverso (AE)** es cualquier incidencia perjudicial en un paciente o sujeto de investigación clínica, al que se le ha administrado un producto farmacéutico o realizado un procedimiento, que no necesariamente tiene una relación causal con este tratamiento. Por lo tanto, un evento adverso puede ser cualquier signo desfavorable y

|                                         |                                       |
|-----------------------------------------|---------------------------------------|
| <i>Código protocolo: ICICOR-2017-01</i> | <i>Versión protocolo: 1.0</i>         |
| <i>EudraCT Number: 2017-002799-18</i>   | <i>Fecha protocolo: 03 Julio 2017</i> |

no intencionado (incluyendo un hallazgo anormal de laboratorio), síntoma o enfermedad asociado temporalmente con el uso de un medicamento o procedimiento en investigación, estén o no relacionados con el producto médico.

Un **evento adverso grave (SAE)** significa un evento adverso que requiere ya sea hospitalización del paciente, prolongación de la hospitalización existente, cause una anomalía/defecto congénito, ocasione una discapacidad o incapacidad persistente o significativa, sea peligroso para la vida, o resulte en la muerte.

## **18. CONSIDERACIONES PRÁCTICAS**

### **18.1. MANUAL DEL INVESTIGADOR**

En el MI se detalla la justificación de la realización del ensayo, así como la ficha técnica del medicamento.

### **18.2. CUADERNO DE RECOGIDA DE DATOS (CRD)**

La información clínica será recogida en un formulario estandarizado. La información final será revisada e introducida en una base de datos común. Se realizará control de la calidad de los datos y cuando sea preciso se verificará la información dudosa de los registros originales por la agencia de monitorización externa. Para la protección de datos personales se realizará la identificación de pacientes mediante una numeración, sin utilizar nombre ni apellidos en ningún documento ni archivo derivado de la base de datos. Únicamente los investigadores del estudio tendrán acceso a la base de datos y se comprometen a preservar la confidencialidad de los pacientes y participantes en el estudio. La responsabilidad legal de la base de datos será del investigador principal y del coordinador del estudio.

Toda la información requerida por el protocolo se recogerá mediante un Cuaderno de Recogida de Datos.

### **18.3. DOCUMENTOS FUENTE**

Los documentos fuente son aquellos que forman parte de la historia clínica del paciente.

### **18.4. CONFIDENCIALIDAD Y CUSTODIA DE LA DOCUMENTACIÓN**

La documentación del estudio se conservará en el centro durante un periodo de 15 años. Ni el movimiento, ni la destrucción se permite sin previa consulta y aprobación del Promotor.

### **18.5. PROCEDIMIENTOS DE MONITORIZACIÓN Y AUDITORÍA: PROCEDIMIENTOS DE MONITORIZACIÓN**

En el momento de iniciar el estudio, un representante del promotor (es decir un monitor) revisará exhaustivamente el protocolo y cuaderno de recogida de datos (CRD) con los investigadores y su personal. Se organizará una visita de inicio en cada centro implicado en el estudio con el fin de permitir que el monitor se reúna con los equipos locales (incluidos, aunque sin limitarse a ellos, el equipo del investigador principal, personas implicadas del departamento de farmacia, si corresponde, y de los laboratorios locales) y revise en detalle los procedimientos del estudio antes de la selección del primer paciente.

El investigador autoriza a los monitores, auditores, representantes del CEIC y a las Autoridades Competentes a tener acceso directo a los datos y documentos fuente de los participantes en el ensayo clínico.

|                                         |                                       |
|-----------------------------------------|---------------------------------------|
| <i>Código protocolo: ICICOR-2017-01</i> | <i>Versión protocolo: 1.0</i>         |
| <i>EudraCT Number: 2017-002799-18</i>   | <i>Fecha protocolo: 03 Julio 2017</i> |

Durante el curso del estudio, el monitor visitará regularmente al investigador. El investigador debe asignar una parte razonable de su tiempo y de los miembros específicos de su personal involucrados en el estudio, para las visitas de monitorización.

El investigador autorizará al monitor a:

- Ver el centro, las instalaciones y el material utilizado en el estudio,
- Reunirse con las personas de su equipo implicadas en el ensayo,
- Consultar el conjunto de los documentos relacionados con el estudio,
- Verificar que los cuadernos de recogida de datos electrónicos, están correctamente rellenos,
- Tener acceso directo a los documentos fuente con el fin de compararlos con los datos del cuaderno de recogida de datos electrónico,
- Comprobar que el estudio se está desarrollando de acuerdo con lo establecido en el protocolo y en la legislación vigente.

En el caso de que se utilicen historias médicas informatizadas, el investigador se compromete:

- Al principio del estudio, a imprimir la totalidad de las historias médicas de todos los participantes,
- Durante el estudio, a imprimir en tiempo real, cada entrada de nuevos datos y cada modificación realizada en los datos ya existentes.

El investigador firmará y fechará personalmente la primera página de cada impresión e indicará el número de páginas. En cada visita de monitorización, el investigador le entregará al monitor el conjunto de las impresiones realizadas en papel de las historias médicas de los participantes. El monitor, a su vez, firmará y fechará personalmente todas las páginas de cada impresión e indicará en la primera página, el número de páginas.

Si el sistema informático utilizado permite realizar un seguimiento de las modificaciones realizadas en las historias, el investigador le entregará al monitor, en cada visita, una impresión de las historias junto con la documentación de las modificaciones. Cada impresión será firmada y fechada personalmente por el investigador en la primera página y por el monitor en todas las páginas. El investigador y el monitor también indicarán en la primera página el número de páginas.

El seguimiento del estudio se realizará periódicamente, en función del ritmo de reclutamiento y previo acuerdo entre el investigador y el monitor.

Toda la información obtenida en el transcurso de estas visitas se tratará de forma estrictamente confidencial.

En el momento de cada visita de monitorización, el monitor revisará el CRD de cada paciente del estudio para certificar que se han completado todos los pasos y que los datos proporcionados son exactos y obtenidos del modo especificado en el protocolo.

El investigador debe estar de acuerdo en permitir el acceso directo del monitor al hospital pertinente y a otros registros clínicos para confirmar que los procesos requeridos en el estudio están siendo llevados a cabo, y que hay coherencia entre estos registros y los CRD. Los pasos que deben comprobarse de este modo incluyen:

- Consentimiento informado firmado por el paciente.
- Fuente de documentación del tiempo y fecha de Consentimiento informado obtenido y nombre de la persona que obtiene el Consentimiento informado.
- La declaración en los informes del hospital/clínico de que el paciente está participando en el estudio clínico.
- Valores de todas las variables predefinidas (definidas por el promotor) y registradas en el CRD y en los informes del hospital/clínico (es decir, procedencia de documentos).
- Programación y dosis de la medicación de estudio y la medicación concomitante de acuerdo a los registros dispensados.
- Acontecimientos adversos.

|                                         |                                       |
|-----------------------------------------|---------------------------------------|
| <i>Código protocolo: ICICOR-2017-01</i> | <i>Versión protocolo: 1.0</i>         |
| <i>EudraCT Number: 2017-002799-18</i>   | <i>Fecha protocolo: 03 Julio 2017</i> |

La documentación que deberá estar disponible para su revisión incluye:

- CRD.
- Formulario de Recogida de Datos.
- Cuadernos de trabajo.
- Todas las grabaciones de las observaciones de las actividades clínicas.
- Todos los informes y grabaciones necesarias para la evaluación y reconstrucción del estudio clínico, incluyendo pero no limitado a:
  - Informes de laboratorio.
  - Registros de ECG.
  - Notas de progreso de pacientes.
  - Informes de farmacia.
  - Registros de Monitorización.
  - Programación acordada.
  - Correspondencia entre el Promotor-Investigadores.
  - Documentos reguladores.
  - Protocolo firmado.
  - Enmienda(s) firmadas.
  - Correspondencia y autorizaciones del CEIC.

El investigador debe permitir también que el monitor verifique que las especificaciones de almacenamiento de la medicación de estudio se están llevando a cabo.

Las entradas de datos incorrectos, inapropiados ó ilegibles del CRD resultarán en preguntas devueltas al investigador para su resolución.

Como resultado de los procesos de investigación no deberá abandonar el centro de estudio ningún dato revelando la identidad de los pacientes. El promotor mantendrá la confidencialidad de todos los registros de los pacientes.

El promotor recogerá los CRD completos en cuanto el monitor haya validado los datos. Normalmente, en cada visita de monitorización, se recogerán los CRD de los pacientes que hayan completado las visitas. El investigador tendrá en su posesión una copia de cada CRD. El investigador debe asegurarse de que los CRD y otra documentación del estudio están guardados y en lugar seguro.

Todos los comentarios relacionados con la conducción del estudio se registrarán en la página de comentarios. Cualquier comentario relacionado con una entrada en el CRD se incluirá una referencia a la página del CRD a la que se refiere.

Durante el curso del estudio, el personal responsable del promotor estará disponible para comentar cualquier cuestión relativa a la conducción del estudio.

El promotor declara que el estudio será llevado a cabo conforme a este protocolo, los principios de Buena Práctica Clínica (BPC), las recomendaciones ICH, las leyes y obligaciones locales (R.D. 223/2004 de 6 de febrero) y la Declaración de Helsinki de la Asociación Médica Mundial (Anexo IV).

## **PROCEDIMIENTOS DE AUDITORÍA**

Además de los procesos rutinarios de control expuestos anteriormente, el promotor lleva a cabo controles para asegurar la calidad de todos los estudios clínicos que patrocina. Otros representantes del promotor podrán llevar a cabo una revisión ó un organismo regulador podría desear llevar a cabo una inspección. Los procedimientos para tal visita son similares a los de la visita de monitorización, y los datos que hayan sido confirmados por el monitor regular del patrocinador podrían ser comprobados de nuevo.

El investigador está de acuerdo con que el promotor, sus empleados o agentes, la Food and Drug Administration (FDA), y/ó otras autoridades sanitarias reguladoras tengan el derecho, durante el transcurso del estudio y después de éste, de revisar y examinar los registros médicos pertinentes relativos a este estudio clínico. Con el documento de consentimiento informado se obtendrá una declaración de cada paciente participante en el estudio permitiendo la publicación de sus registros médicos.

|                                         |                                       |
|-----------------------------------------|---------------------------------------|
| <i>Código protocolo: ICICOR-2017-01</i> | <i>Versión protocolo: 1.0</i>         |
| <i>EudraCT Number: 2017-002799-18</i>   | <i>Fecha protocolo: 03 Julio 2017</i> |

Se requiere que el Investigador informe inmediatamente al promotor de una inspección solicitada por una autoridad reguladora.

El promotor informará al investigador de una inspección en cuanto tenga noticia de ella.

El investigador procederá de la misma forma en caso de ser él quien reciba la notificación de dicha inspección.

El investigador autoriza a los representantes de las Autoridades competentes y a las personas encargadas de la auditoría a:

- Ver el centro, las instalaciones y el material utilizado en el estudio,
- Reunirse con todas las personas de su equipo implicadas en el estudio,
- Tener acceso directo a los datos del ensayo y a los documentos fuente,
- Consultar todos los documentos relacionados con el estudio.

En caso de utilización de historias médicas informatizadas, el investigador se compromete a entregar el conjunto de los documentos fuente así como las impresiones en papel de dichas historias y, si el sistema informático utilizado lo permite, la documentación de las modificaciones realizadas durante el estudio.

## **18.6. CONDICIONES DE ARCHIVO DE DATOS Y DOCUMENTOS**

### **DATOS ADMINISTRATIVOS DEL ESTUDIO**

Al comienzo del estudio se creará un archivo del estudio en cada centro de investigación. En su primera sección se incluirá la lista de los documentos que se deberán mantener en el archivo. Este archivo se actualizará durante el transcurso del estudio y se archivará en el centro durante por lo menos 15 años.

Especificar las condiciones de archivo de datos/su manejo y procesamiento y correcciones.

1. El promotor de ensayo es responsable del archivo de la documentación del ensayo.
2. El Investigador se ocupará de que los códigos de identificación de los sujetos se conserven durante al menos quince años después de concluido ó interrumpido el ensayo.
3. Las historias clínicas de los pacientes y demás datos originales se conservarán el máximo período de tiempo que permita el hospital, la institución ó la consulta privada donde se haya realizado el ensayo.
4. El promotor ó el propietario de los datos conservará toda la restante documentación relativa al ensayo durante el período de validez del producto.

Estos documentos incluirán:

- El protocolo, incluyendo su justificación, objetivos, diseño estadístico y metodología del ensayo, con las condiciones en las que se efectúe y gestione, así como los pormenores de los productos de investigación que se empleen.
- Los procedimientos normalizados de trabajo.
- Todos los informes escritos sobre el protocolo los procedimientos.
- El manual del investigador.
- El cuaderno de recogida de datos de cada sujeto.
- El informe final.
- El certificado de auditoría cuando proceda.

5. El promotor ó el propietario subsiguiente conservará el informe final hasta cinco años después de haberse agotado el plazo de validez de medicamento.

6. Se documentará todo cambio que se produzca en la posesión de los datos.

7. Todos los datos y documentos se pondrán a disposición de las autoridades competentes si éstas así lo solicitan.

8. Se asegurará, en todo caso, la confidencialidad de los datos y documentos contenidos en el archivo.

|                                         |                                       |
|-----------------------------------------|---------------------------------------|
| <i>Código protocolo: ICICOR-2017-01</i> | <i>Versión protocolo: 1.0</i>         |
| <i>EudraCT Number: 2017-002799-18</i>   | <i>Fecha protocolo: 03 Julio 2017</i> |

## **18.7. MODIFICACIONES DEL PROTOCOLO**

Cualquier cambio ó adición (modificación) en este protocolo una vez se ha firmado éste, requiere una enmienda al protocolo por escrito que debe ser aprobada por el promotor y el investigador antes de que el cambio ó adición se puedan considerar efectivos. Una vez aprobada será guardada junto con el protocolo inicial. El número de la enmienda y su fecha de emisión deberán anotarse en la primera página del protocolo que debe conservar el investigador.

Si una enmienda afecta significativamente la seguridad de los pacientes, el propósito de la investigación ó la calidad científica del estudio, debe ser aprobada formalmente por el CEIC de todos los centros participantes y, de acuerdo a la legislación local, por las autoridades reguladoras. Estas modificaciones entrarán en vigor una vez obtenido el dictamen favorable del CEIC, respeto de exigencias reglamentarias y una vez firmado el documento de enmienda por cada una de las partes, a excepción de aquellas enmiendas realizadas con el fin de evitar un riesgo inmediato para los participantes. Se debe entregar una copia de la aprobación del CEIC por escrito al promotor. Ejemplos de enmiendas que requieren aprobación:

- Aumento de dosis del producto o de duración de la exposición de los pacientes.
- Cambio significativo en el diseño del estudio (p. e. adición o supresión de un grupo de control).
- Aumento en el número de procedimientos invasivos a los que están expuestos los pacientes.
- Adición o supresión de un procedimiento de prueba por monitorización de seguridad.

Una enmienda pasa a formar parte integral del protocolo una vez aprobada por el CEIC.

Las enmiendas administrativas al protocolo que no requieran aprobación del CEIC pueden comunicarse a estos organismos para su información.

Los requisitos mencionados anteriormente no imposibilitan cualquier acción inmediata realizada por el Investigador ó el promotor en interés de la seguridad de un paciente. En los casos en los que el Investigador lleve a cabo un cambio inmediato del protocolo de este tipo, se debería notificar tanto al promotor como al CEIC del Investigador en los siguientes diez días laborables.

Las desviaciones del protocolo que afecten a la variable principal de eficacia ó a los parámetros de seguridad podrían someter los datos a una posible exclusión del análisis. El Investigador debe dar explicaciones al promotor de qué tipo de desviaciones del protocolo son y por qué ocurrieron. Las desviaciones del protocolo, tanto si afectan a la variable principal de eficacia ó a los parámetros de seguridad como a la conducción general del estudio, se documentarán antes de desenmascarar los códigos de medicación.

## **18.8. INFORME FINAL**

El promotor elaborará un informe final del estudio. Una copia del informe final será fechada y firmada por el Coordinadores y el Director de la Unidad.

## **18.9. CONDICIONES DE PUBLICACIÓN**

El Dr José Alberto San Román Calvar, en calidad de promotor del estudio, asume el conjunto de responsabilidades ligado a esta función, y a la propiedad exclusiva de los resultados del estudio, que podrá explotar libremente. Para permitir una utilización efectiva de la información, es indispensable que los resultados del estudio sean comunicados al Promotor en cuanto sea posible.

Cualquier proyecto de publicación y/o comunicación deberá ser sometido al promotor al menos 30 días antes en caso de la publicación y 15 días antes, en caso de un abstract, sobre la fecha prevista de presentación para una publicación o comunicación del proyecto. El promotor realizará los comentarios correspondientes en un plazo de 15 días para la publicación y de 7 días para el abstract a partir de la fecha en la que

|                                         |                                       |
|-----------------------------------------|---------------------------------------|
| <i>Código protocolo: ICICOR-2017-01</i> | <i>Versión protocolo: 1.0</i>         |
| <i>EudraCT Number: 2017-002799-18</i>   | <i>Fecha protocolo: 03 Julio 2017</i> |

recibe el proyecto. El investigador que someta el proyecto deberá tener en cuenta los comentarios del promotor. En caso contrario, el investigador deberá argumentar por escrito al promotor las razones para no hacerlo.

La publicación de los ensayos clínicos autorizados se realizará en revistas científicas y con mención del Comité Ético de Investigación clínica correspondiente. Cuando se hagan públicos estudios y trabajos de investigación sobre medicamentos dirigidos a la comunidad científica, se harán constar los fondos obtenidos por el autor por ó para su realización y la fuente de financiación. Se mantendrá en todo momento el anonimato de los sujetos participantes en el ensayo. Los resultados ó conclusiones de los ensayos clínicos se comunicarán prioritariamente en publicaciones científicas antes de ser divulgados al público no sanitario. No se darán a conocer de modo prematuro ó sensacionalista procedimientos de eficacia todavía no determinada ó exagerar ésta. La publicidad de productos en fase de investigación clínica está absolutamente prohibida, tal como se recoge en la Ley 34/1988 del 11 de Noviembre, General de Publicidad.

#### **18.10. SEGURO**

Dentro del marco de la legislación española vigente, según Real Decreto 1090/2015 del 4 de diciembre de 2015, el presente estudio se trata de un ensayo clínico de bajo nivel de intervención, dado que el medicamento de investigación está autorizado (Ver Anexo V con ficha técnica de ramipril), se utiliza de conformidad con los términos de la autorización de comercialización y su uso se basa en pruebas y datos científicos publicados (anteriormente citados) sobre la seguridad y eficacia; Además, coincide que los procedimientos complementarios de diagnóstico o seguimiento entrañan un riesgo o carga adicional mínimo para la seguridad de los sujetos comparado con la práctica clínica habitual. Bajo lo dispuesto por esta misma ley, no requiere la contratación de un seguro especial para el presente estudio por el tipo de estudio del cual se trata.

## **19. UTILIDAD PRÁCTICA DE LOS RESULTADOS**

El aumento de la enfermedad degenerativa de la válvula aórtica relacionado con el envejecimiento progresivo de nuestra población es responsable de una prevalencia creciente de esta enfermedad en España, constituyendo por tanto un problema de salud pública de máximo impacto. La investigación tiene como principal objetivo comprobar el beneficio clínico y en el remodelado del bloqueo del SRA tras la sustitución de la válvula aórtica de forma percutánea. Este procedimiento está avalado por numerosos estudios en pacientes de alto riesgo quirúrgico y ha demostrado no ser inferior en aquellos pacientes de riesgo quirúrgico intermedio. Un remodelado ventricular desfavorable posterior al implante creemos puede ser evitado con un fármaco ya comercializado, seguro, barato y con amplia experiencia de uso en cardiología. Esto redituaria en una menor cantidad de eventos cardiovasculares en el seguimiento, mejor funcionalidad, mejoría de los parámetros de RM e idealmente un descenso de la morbimortalidad.

#### **LIMITACIONES DEL ESTUDIO**

El reclutamiento de pacientes puede ser más lento del esperado. Contamos con un número elevado de grupos interesados en participar que en caso necesario, posiblemente en el futuro, valoraremos la posibilidad de colaboración para aumentar la robustez del estudio y obtener los beneficios científicos de un estudio multicéntrico.

|                                         |                                       |
|-----------------------------------------|---------------------------------------|
| <i>Código protocolo: ICICOR-2017-01</i> | <i>Versión protocolo: 1.0</i>         |
| <i>EudraCT Number: 2017-002799-18</i>   | <i>Fecha protocolo: 03 Julio 2017</i> |

El estudio no es ciego, aunque los eventos clínicos serán asignados por un comité que no conocerá el grupo de tratamiento del paciente; así como también el remodelado ventricular será cuantificado por expertos que no conocen el tratamiento del paciente.

## **20. ÉTICA**

### **COMITÉS ÉTICOS DE INVESTIGACIÓN CLÍNICA**

El promotor, investigador o coordinador (según lo requiera la legislación local vigente) presentará, el protocolo del estudio, la “Hoja de información y consentimiento del participante”, y la “lista de investigadores” al CEIC o CEIC correspondientes.

El estudio no empezará hasta que se haya obtenido el dictamen favorable del CEIC, se haya cumplido con los requisitos reglamentarios locales, y los firmantes contractuales implicados hayan firmado el protocolo.

Consentimiento informado de acuerdo a los señalamientos de la Declaración de Helsinki, y sus revisiones posteriores, lo establecido en la Ley 14/2007 de 3 de julio sobre investigación biomédica y en el real Decreto 1090/2015. En la legislación vigente sobre la protección de datos de carácter personal, Las Buenas Prácticas Clínica, y bajo toda condición que determine el Comité Ético de Investigación Clínica.

### **REALIZACIÓN DEL ESTUDIO**

El estudio seguirá los principios éticos de la Declaración de Helsinki 1964, revisada en Tokio 2004 (ver anexo III).

### **INFORMACIÓN Y CONSENTIMIENTO INFORMADO DE LOS PARTICIPANTES**

El investigador o la persona que éste haya designado, obtendrá el consentimiento por escrito de cada participante antes o, como muy tarde, en la primera visita de estudio.

Antes de obtenerlo, el investigador o la persona designada por él informará a cada participante de los objetivos, beneficios, riesgos e inconvenientes del estudio así como de la naturaleza del/de los producto/s en estudio.

El participante recibirá la hoja de información y consentimiento redactada en un lenguaje simple y claro. Debe disponer de un tiempo de reflexión suficiente para informarse sobre los pormenores del estudio y decidir participar o no en el mismo.

La hoja de información y consentimiento del participante será firmada y fechada en dos ejemplares originales por el participante y por la persona que le ha informado.

Si el participante no es capaz de leer, durante la discusión del consentimiento informado estará presente un testigo independiente del estudio. El participante dará su consentimiento de forma oral y si es capaz de hacerlo, fechará y firmará personalmente el consentimiento junto con la persona que le ha informado. Asimismo, el testigo deberá completar, fechar y firmar el consentimiento junto con la persona que le ha informado.

Se le entregará al participante un ejemplar original de dicho consentimiento y el investigador conservará el otro original en su poder.

Se adjunta a este protocolo una copia de la hoja de información y consentimiento informado del participante redactado en castellano (anexo I)

### **MODIFICACIONES DE LA HOJA DE INFORMACIÓN Y CONSENTIMIENTO INFORMADO**

Cualquier cambio en la hoja de información y consentimiento del participante es objeto de una enmienda a este documento y debe ser sometido al Comité Ético de Investigación Clínica y a las Autoridades competentes.

Un ejemplar de esa nueva hoja de información escrita en la lengua oficial figurará en la enmienda de esta hoja de consentimiento informado.

|                                         |                                       |
|-----------------------------------------|---------------------------------------|
| <i>Código protocolo: ICICOR-2017-01</i> | <i>Versión protocolo: 1.0</i>         |
| <i>EudraCT Number: 2017-002799-18</i>   | <i>Fecha protocolo: 03 Julio 2017</i> |

La enmienda entrará en vigor una vez que se haya obtenido el acuerdo escrito por parte del CEIC, se hayan cumplido las obligaciones reglamentarias y se hayan obtenido las firmas contractuales, excepto en el caso de una enmienda necesaria para evitar un riesgo inmediato a los participantes.

Cada participante afectado por la enmienda y/o su representante legal o un testigo independiente junto con la persona que haya informado al participante deberá fechar y firmar la nueva versión de la hoja de información y consentimiento informado. El participante se quedará con un ejemplar original de esta nueva información.

## **21. ANEXOS**

### **ANEXO I. CONSENTIMIENTO INFORMADO**

#### **HOJA DE INFORMACIÓN AL PACIENTE. CONSENTIMIENTO INFORMADO**

**SERVICIO:** Cardiología.

**INVESTIGADOR RESPONSABLE:** J. Alberto San Román

**TELÉFONO DE CONTACTO:** 983420026 **EMAIL:** asanroman@secardiologia.es

**NOMBRE DE LA LÍNEA DE TRABAJO:** Beneficio del bloqueo del sistema renina-angiotensina sobre la evolución clínica y el remodelado ventricular tras la colocación de una prótesis percutánea aórtica.

**VERSIÓN DE DOCUMENTO:** V1. Junio 2017

---

#### **I) Finalidad de la línea de trabajo propuesta:**

La colocación de una prótesis percutánea aórtica (PPAo) es una alternativa excelente y menos agresiva a la sustitución quirúrgica convencional en pacientes con estenosis aórtica degenerativa. A pesar de ello, la evolución a largo de plazo de estos pacientes no es todo lo favorable que podría esperarse. El bloqueo del sistema renina-angiotensina ha demostrado que mejora el remodelado adverso en la estenosis aórtica severa y tras la cirugía convencional. A usted le han sustituido su válvula aórtica degenerada mediante una prótesis percutánea

#### **Selección de participantes:**

Se hará un estudio aleatorizado abierto en pacientes en más de 6 centros con 336 pacientes a los que se coloca una PPAo por estenosis aórtica severa. El grupo de tratamiento activo recibirá tratamiento habitual con ramipril. El grupo control recibirá el tratamiento habitual. En todos los pacientes se hará un seguimiento clínico durante 3 años. En todos los pacientes se hará una resonancia magnética cardíaca inicialmente tras el procedimiento y al año para valorar el remodelado ventricular.

#### **Procedimientos:**

Esta investigación conllevará un seguimiento de su evolución, con visitas al mes, a los tres y a los doce meses. Además, al año le repetiremos el ecocardiograma y la resonancia cardíaca que programaremos antes de su alta. Después contactaremos con usted telefónicamente a los tres y a los cinco años.

#### **Beneficios y Riesgos:**

El ramipril, fármaco en estudio, es un medicamento comercializado, con más de 15 años de uso, de amplia utilización en cardiología y seguro, pudiendo en ocasiones provocar tos irritativa. Su uso, en pacientes como usted, pensamos que puede mejorar el proceso de deformación del corazón que se produce por la enfermedad que ha padecido y por el implante de la nueva válvula.

#### **Duración**

El periodo esperado de su participación es 5 años.

*Los resultados de estos estudios ayudarán probablemente a tratar de manera más precisa a los enfermos con una enfermedad como la suya.*

#### **II) Algunas consideraciones sobre su participación:**

Es importante que Vd., como participante en esta línea de trabajo, conozca varios aspectos importantes:

|                                         |                                       |
|-----------------------------------------|---------------------------------------|
| <i>Código protocolo: ICICOR-2017-01</i> | <i>Versión protocolo: 1.0</i>         |
| <i>EudraCT Number: 2017-002799-18</i>   | <i>Fecha protocolo: 03 Julio 2017</i> |

- A) Su participación es totalmente voluntaria. Dentro del proceso de asistencia hospitalaria por su enfermedad, se realizará una encuesta clínica. Esta encuesta no interferirá con los procesos diagnósticos o terapéuticos que usted ha de recibir por causa de su enfermedad
- B) Puede plantear todas las dudas que considere sobre su participación en este estudio.
- C) No percibirá ninguna compensación económica o de otro tipo por su participación en el estudio. No obstante, la información generada en el mismo podría ser fuente de beneficios comerciales. En tal caso, están previstos mecanismos para que estos beneficios reviertan en la salud de la población, aunque no de forma individual en el participante.
- D) La información obtenida se almacenará en una base de datos, en soporte informático, registrada en la Agencia Española de Protección de Datos, según lo indicado en la legislación vigente sobre protección de datos de carácter personal (Ley Orgánica 15/1999), de 13 de diciembre). Los datos registrados serán tratados estadísticamente de forma codificada.
- E) En todo momento el participante tendrá derecho de acceso, rectificación o cancelación de los datos depositados en la base de datos siempre que expresamente lo solicite. Para ello deberá ponerse en contacto con el investigador principal. Los datos quedarán custodiados bajo la responsabilidad del Investigador Principal del Estudio, **Dr. J. Albero San Román**.
- F) Los datos serán guardados de forma indefinida, al menos hasta la consecución de los fines científicos de la línea de trabajo arriba expuesta. Dichos datos podrán ser utilizados por el grupo del investigador principal en estudios futuros de investigación relacionados con la línea de trabajo arriba expuesta. Dichos datos podrán ser cedidos a otros investigadores designados por el Investigador Principal para trabajos relacionados con esta línea, siempre al servicio de proyectos que tengan alta calidad científica y respeto por los principios éticos. En estos dos últimos casos, se solicitará antes autorización al CEIC (Comité Ético de Investigación Clínica) del Área de Salud Valladolid Éste.
- G) La falta de consentimiento o la revocación de este consentimiento previamente otorgado no supondrá perjuicio alguno en la asistencia sanitaria que Vd. recibe/recibirá.
- H) Es posible que los estudios realizados aporten información relevante para su salud o la de sus familiares. Vd. tiene derecho a conocerla y transmitirla a sus familiares si así lo desea.
- I) Sólo si Vd. lo desea, existe la posibilidad de que pueda ser contactado en el futuro para completar o actualizar la información asociada al estudio.

**CONSENTIMIENTO INFORMADO DEL PACIENTE POR ESCRITO.**

**Estudio: Beneficio del bloqueo del sistema renina-angiotensina sobre la evolución clínica y el remodelado ventricular tras la colocación de una prótesis percutánea aórtica**

Yo, \_\_\_\_\_  
(Nombre y apellidos de paciente ó representante legal)

He leído la información que me ha sido entregada.  
He recibido la hoja de información que me ha sido entregada.  
He podido hacer preguntas sobre el estudio.  
He recibido suficiente información sobre el estudio.  
He hablado del estudio con \_\_\_\_\_  
(Nombre y apellidos del investigador)

Comprendo que mi participación es voluntaria.  
Comprendo que puedo retirarme del estudio:  
1.- Cuando quiera.  
2.- Sin tener que dar explicaciones.  
3.- Sin que esto repercuta en mis cuidados médicos.

Por la presente, otorgo mi consentimiento informado y libre para participar en esta investigación.

Accedo a que los médicos del HOSPITAL CLÍNICO UNIVERSITARIO DE VALLADOLID contacten conmigo en el futuro en caso de que se necesite obtener nuevos datos. ...SI.... NO (marcar con una X lo que proceda)

Accedo a que los médicos del HOSPITAL CLÍNICO UNIVERSITARIO DE VALLADOLID contacten conmigo en caso de que los estudios realizados sobre mis datos aporten información relevante para mi salud o la de mis familiares ...SI..... NO (marcar con una X lo que proceda)

Una vez firmada, me será entregada una copia del documento de consentimiento.

\_\_\_\_\_  
FIRMA DEL PACIENTE/REPRESENTANTE LEGAL                      NOMBRE Y APELLIDO      FECHA

|                                         |                                       |
|-----------------------------------------|---------------------------------------|
| <i>Código protocolo: ICICOR-2017-01</i> | <i>Versión protocolo: 1.0</i>         |
| <i>EudraCT Number: 2017-002799-18</i>   | <i>Fecha protocolo: 03 Julio 2017</i> |



Adoptada por la 18ª Asamblea General de la Asociación Médica Mundial (AMM) Helsinki, Finlandia, Junio 1964  
y enmendada por las

29ª Asamblea General de la AMM, Tokio, Japón, Octubre 1975

35ª Asamblea General de la AMM, Venecia, Italia, Octubre 1983

41ª Asamblea General de la AMM, Hong Kong, Septiembre 1989

48ª Asamblea General de la AMM, Somerset West, Sudáfrica, Octubre 1996

y la 52ª Asamblea General de la AMM, Edimburgo, Escocia, Octubre 2000 y

Nota aclaratoria al Párrafo 29, añadida por la Asamblea General de la AMM, Washington 2002

Nota aclaratoria al Párrafo 30, añadida por la Asamblea General de la AMM, Tokio 2004.

## **A. INTRODUCCION**

1. La Asociación Médica Mundial ha promulgado la Declaración de Helsinki como una propuesta de principios éticos que sirvan para orientar a los médicos y a otras personas que realizan investigación médica en seres humanos. La investigación médica en seres humanos incluye la investigación del material humano o de información identificables.
2. El deber del médico es promover y velar por la salud de las personas. Los conocimientos y la conciencia del médico han de subordinarse al cumplimiento de ese deber.
3. La Declaración de Ginebra de la Asociación Médica Mundial vincula al médico con la fórmula "velar solícitamente y ante todo por la salud de mi participante", y el Código Internacional de Ética Médica afirma que: "El médico debe actuar solamente en el interés del participante al proporcionar atención médica que pueda tener el efecto de debilitar la condición mental y física del participante".
4. El progreso de la medicina se basa en la investigación, la cual, en último término, tiene que recurrir muchas veces a la experimentación en seres humanos.
5. En investigación médica en seres humanos, la preocupación por el bienestar de los seres humanos debe tener siempre primacía sobre los intereses de la ciencia y de la sociedad.
6. El propósito principal de la investigación médica en seres humanos es mejorar los procedimientos preventivos, diagnósticos y terapéuticos, y también comprender la etiología y patogenia de las enfermedades. Incluso, los mejores métodos preventivos, diagnósticos y terapéuticos disponibles deben ponerse a prueba continuamente a través de la investigación para que sean eficaces, efectivos, accesibles y de calidad.
7. En la práctica de la medicina y de la investigación médica actual, la mayoría de los procedimientos preventivos, diagnósticos y terapéuticos implican algunos riesgos y costos.
8. La investigación médica está sujeta a normas éticas que sirven para promover el respeto a todos los seres humanos y para proteger su salud y sus derechos individuales. Algunas poblaciones sometidas a la investigación son vulnerables y necesitan protección especial. Se deben reconocer las necesidades particulares de los que tienen desventajas económicas y médicas. También se debe prestar atención especial a los que no pueden otorgar o rechazar el consentimiento por sí mismos, a los que pueden otorgar el consentimiento bajo presión, a los que no se beneficiarán personalmente con la investigación y a los que tienen la investigación combinada con la atención médica.
9. Los investigadores deben conocer los requisitos éticos, legales y jurídicos para la investigación en seres humanos en sus propios países, al igual que los requisitos internacionales vigentes. No se debe permitir que un requisito ético, legal o jurídico disminuya o elimine cualquiera medida de protección para los seres humanos establecida en esta Declaración.

## **B. PRINCIPIOS BASICOS PARA TODA INVESTIGACION MÉDICA**

10. En la investigación médica, es deber del médico proteger la vida, la salud, la intimidad y la dignidad del ser humano.
11. La investigación médica en seres humanos debe conformarse con los principios científicos generalmente aceptados, y debe apoyarse en un profundo conocimiento de la bibliografía científica, en otras fuentes de información pertinentes, así como en experimentos de laboratorio correctamente realizados y en animales, cuando sea oportuno.
12. Al investigar, hay que prestar atención adecuada a los factores que puedan perjudicar el medio ambiente. Se debe cuidar también del bienestar de los animales utilizados en los experimentos.
13. El proyecto y el método de todo procedimiento experimental en seres humanos debe formularse claramente en un protocolo experimental. Este debe enviarse, para consideración, comentario, consejo, y cuando sea oportuno, aprobación, a un comité de evaluación ética especialmente designado, que debe ser independiente del investigador, del promotor o de cualquier otro tipo de influencia indebida. Se sobreentiende que ese comité independiente debe actuar en conformidad con las leyes y reglamentos vigentes en el país donde se realiza la investigación experimental. El comité tiene el derecho de controlar los ensayos en curso. El investigador tiene la obligación de proporcionar información del control al comité, en especial sobre todo incidente adverso grave. El investigador también debe presentar al comité, para que la revise, la información sobre financiamiento, patrocinadores, afiliaciones institucionales, otros posibles conflictos de interés e incentivos para las personas del estudio.
14. El proyecto y el método de todo procedimiento experimental en seres humanos debe formularse claramente en un protocolo experimental. Este debe enviarse, para consideración, comentario, consejo, y

|                                         |                                       |
|-----------------------------------------|---------------------------------------|
| <i>Código protocolo: ICICOR-2017-01</i> | <i>Versión protocolo: 1.0</i>         |
| <i>EudraCT Number: 2017-002799-18</i>   | <i>Fecha protocolo: 03 Julio 2017</i> |

cuando sea oportuno, aprobación, a un comité de evaluación ética especialmente designado, que debe ser independiente del investigador, del promotor o de cualquier otro tipo de influencia indebida. Se sobreentiende que ese comité independiente debe actuar en conformidad con las leyes y reglamentos vigentes en el país donde se realiza la investigación experimental. El comité tiene el derecho de controlar los ensayos en curso. El investigador tiene la obligación de proporcionar información del control al comité, en especial sobre todo incidente adverso grave. El investigador también debe presentar al comité, para que la revise, la información sobre financiamiento, patrocinadores, afiliaciones institucionales, otros posibles conflictos de interés e incentivos para las personas del estudio.

15. El protocolo de la investigación debe hacer referencia siempre a las consideraciones éticas que fueran del caso, y debe indicar que se han observado los principios enunciados en esta Declaración.

16. La investigación médica en seres humanos debe ser llevada a cabo sólo por personas científicamente calificadas y bajo la supervisión de un médico clínicamente competente. La responsabilidad de los seres humanos debe recaer siempre en una persona con capacitación médica, y nunca en los participantes en la investigación, aunque hayan otorgado su consentimiento.

17. Todo proyecto de investigación médica en seres humanos debe ser precedido de una cuidadosa comparación de los riesgos esperados con los beneficios previsibles para el individuo o para otros. Esto no impide la participación de voluntarios sanos en la investigación médica. El diseño de todos los estudios debe estar disponible para el público.

18. Los médicos deben abstenerse de participar en proyectos de investigación en seres humanos a menos de que estén seguros de que los riesgos inherentes han sido adecuadamente evaluados y de que es posible hacerles frente de manera satisfactoria. Deben suspender el experimento en marcha si observan que los riesgos que implican son más importantes que los beneficios esperados y si existen pruebas concluyentes de resultados positivos o beneficiosos.

19. La investigación médica en seres humanos sólo debe realizarse cuando la importancia de su objetivo es mayor que el riesgo inherente y los costos para el individuo. Esto es especialmente importante cuando los seres humanos son voluntarios sanos.

20. La investigación médica sólo se justifica si existen posibilidades razonables de que la población, sobre la que la investigación se realiza, podrá beneficiarse de sus resultados.

21. Para tomar parte en un proyecto de investigación, los individuos deben ser participantes voluntarios e informados.

22. Siempre debe respetarse el derecho de los participantes en la investigación a proteger su integridad. Deben tomarse toda clase de precauciones para resguardar la intimidad de los individuos, la confidencialidad de la información del participante y para reducir al mínimo las consecuencias de la investigación sobre su integridad física y mental y su personalidad.

23. En toda investigación en seres humanos, cada individuo potencial debe recibir información adecuada acerca de los objetivos, métodos, fuentes de financiación, posibles conflictos de intereses, afiliaciones institucionales del investigador, beneficios esperados, riesgos previsibles e incomodidades derivadas del experimento. La persona debe ser informada del derecho de participar o no en la investigación y de retirar su consentimiento en cualquier momento, sin exponerse a represalias. Después de asegurarse de que el individuo ha comprendido la información, el médico debe obtener entonces, preferiblemente por escrito, el consentimiento informado y voluntario de la persona. Si el consentimiento no se puede obtener por escrito, el proceso para obtenerlo debe ser documentado y atestado formalmente.

24. Al obtener el consentimiento informado para el proyecto de investigación, el médico debe poner especial cuidado cuando el individuo está vinculado con él por una relación de dependencia o si consiente bajo presión. En un caso así, el consentimiento informado debe ser obtenido por un médico bien informado que no participe en la investigación y que sea independiente de dicha relación.

25. Cuando la persona sea legalmente incapaz, o inhábil física o mentalmente para otorgar su consentimiento, o menor de edad, el investigador debe obtener el consentimiento informado del representante legal y de acuerdo con la ley vigente. Estos grupos no deben ser incluidos en la investigación a menos que ésta sea necesaria para promover la salud de la población representada y esta investigación no pueda realizarse en personas legalmente capaces.

26. Si una persona considerada incompetente por la ley, como es el caso de un menor de edad, es capaz de dar su asentimiento a participar o no en la investigación, el investigador debe obtenerlo, además del consentimiento del representante legal.

27. La investigación en individuos de los que no se puede obtener consentimiento, incluso por representante o con anterioridad, se debe realizar sólo si la condición física/mental que impide obtener el consentimiento informado es una característica necesaria de la población investigada. Las razones específicas por las que se utilizan participantes en la investigación que no pueden otorgar su consentimiento informado deben ser estipuladas en el protocolo experimental que se presenta para consideración y aprobación del comité de evaluación. El protocolo debe establecer que el consentimiento del individuo o de un representante legal para mantenerse en la investigación debe obtenerse a la mayor brevedad posible.

28. Tanto los autores como los editores tienen obligaciones éticas. Al publicar los resultados de su investigación, el médico está obligado a mantener la exactitud de los datos y resultados. Se deben publicar tanto los resultados negativos como los positivos o de lo contrario deben estar a la disposición del público. En la publicación se debe citar la fuente de financiación, afiliaciones institucionales y cualquier

|                                         |                                       |
|-----------------------------------------|---------------------------------------|
| <i>Código protocolo: ICICOR-2017-01</i> | <i>Versión protocolo: 1.0</i>         |
| <i>EudraCT Number: 2017-002799-18</i>   | <i>Fecha protocolo: 03 Julio 2017</i> |

posible conflicto de intereses. Los informes sobre investigaciones que no se ciñan a los principios descritos en esta Declaración no deben ser aceptados para su publicación.

### **C. PRINCIPIOS APLICABLES CUANDO LA INVESTIGACION MEDICA SE COMBINA CON LA ATENCION MEDICA**

29. El médico puede combinar la investigación médica con la atención médica, sólo en la medida en que tal investigación acredite un justificado valor potencial preventivo, diagnóstico o terapéutico. Cuando la investigación médica se combina con la atención médica, las normas adicionales se aplican para proteger a los participantes que participan en la investigación.

30. Los posibles beneficios, riesgos, costos y eficacia de todo procedimiento nuevo deben ser evaluados mediante su comparación con los mejores métodos preventivos, diagnósticos y terapéuticos disponibles. Ello no excluye que pueda usarse un placebo, o ningún tratamiento, en estudios para los que no se dispone de procedimientos preventivos, diagnósticos o terapéuticos probados. (*Ver nota aclaratoria\**).

31. Al final de la investigación, todos los participantes que participan en el estudio deben tener la certeza de que contarán con los mejores métodos preventivos, diagnósticos y terapéuticos disponibles, identificados por el estudio (*Ver nota aclaratoria\**).

32. El médico debe informar cabalmente al participante los aspectos de la atención que tienen relación con la investigación. La negativa del participante a participar en una investigación nunca debe perturbar la relación médico-participante.

33. Cuando los métodos preventivos, diagnósticos y terapéuticos no existen o han resultado ineficaces en la atención de un enfermo, el médico, con el consentimiento informado del participante, puede permitirse usar procedimientos preventivos, diagnósticos y terapéuticos nuevos o no probados, si, a su juicio, ello da alguna esperanza de salvar la vida, restituir la salud o aliviar el sufrimiento. Siempre que sea posible, tales medidas deben ser investigadas a fin de evaluar su seguridad y eficacia. En todos los casos, esa información nueva debe ser registrada y, cuando sea oportuno, publicada. Se deben seguir todas las otras normas pertinentes de esta Declaración.

#### **\*Nota aclaratoria al párrafo 29 de la declaración de Helsinki de la AAM**

La AMM reafirma que se debe tener muchísimo cuidado al utilizar ensayos con placebo y, en general, esta metodología sólo se debe emplear si no se cuenta con una terapia probada y existente. Sin embargo, los ensayos con placebo son éticamente aceptables en ciertos casos, incluso si se dispone de una terapia probada, si se cumplen las siguientes condiciones:

- cuando por razones metodológicas, científicas y apremiantes, su uso es necesario para determinar la eficacia y la seguridad de un método preventivo, diagnóstico o terapéutico; o
- cuando se prueba un método preventivo, diagnóstico o terapéutico para una enfermedad de menos importancia que no implique un riesgo adicional, efectos adversos graves o daño irreversible para los participantes que reciben el placebo.

Se deben seguir todas las otras disposiciones de la Declaración de Helsinki, en especial la necesidad de una revisión científica y ética apropiada.

#### **\*Nota aclaratoria al párrafo 30 de la declaración de Helsinki de la AAM**

Por la presente, la AMM reafirma su posición de que es necesario durante el proceso de planificación del estudio identificar el acceso después del ensayo de los participantes en el estudio a procedimientos preventivos diagnósticos y terapéuticos que han resultado beneficiosos en el estudio o el acceso a otra atención apropiada.

Las disposiciones para el acceso después del ensayo u otra atención deben ser descritos en el protocolo del estudio, de manera que el comité de revisión ética pueda considerar dichos arreglos durante su revisión.

♣ ♣ ♣

9.10.2004

*La declaración de Helsinki (Documento 17.C) es un documento oficial de la Asociación Médica Mundial, representando a los médicos en el mundo. Adaptada en 1964 en Helsinki (Finlandia), fue revisada en 1975 en Tokio (Japón), en 1983 en Venecia (Italia), en 1989 en Hong Kong, en 1996 en Somerset West (Sudáfrica), en 2000 en Edimburgo (Escocia), por la Asamblea General de la AMM, Washington 2002 (adición de una nota aclaratoria al párrafo 29) y por la Asamblea General de la AMM, Tokio 2004 (adición de una nota aclaratoria al párrafo 30).*

|                                         |                                       |
|-----------------------------------------|---------------------------------------|
| <i>Código protocolo: ICICOR-2017-01</i> | <i>Versión protocolo: 1.0</i>         |
| <i>EudraCT Number: 2017-002799-18</i>   | <i>Fecha protocolo: 03 Julio 2017</i> |
