# Supplementary material for: Impact of renin-angiotensin system inhibitors on clinical outcomes and ventricular remodelling after transcatheter aortic valve implantation: rationale and design of the RASTAVI randomised multicentre study
Source: PubMed Central journal article supplement — BMJ Open. 2018 Feb 13;8(2):e020255. doi: 10.1136/bmjopen-2017-020255 (PMC5829899; doi:10.1136/bmjopen-2017-020255), 2018-02-13
Supplement: bmjopen-2017-020255supp003.pdf [file bmjopen-2017-020255supp003.pdf]

## HOJA DE INFORMACIÓN AL PACIENTE. CONSENTIMIENTO INFORMADO

**SERVICIO:** Cardiología.

**INVESTIGADOR RESPONSABLE:** J. Alberto San Román

**TELÉFONO DE CONTACTO:** 983420026 **EMAIL:** asanroman@secardiologia.es

**NOMBRE DE LA LÍNEA DE TRABAJO:** Beneficio del bloqueo del sistema renina-angiotensina sobre la evolución clínica y el remodelado ventricular tras la colocación de una prótesis percutánea aórtica.

**VERSIÓN DE DOCUMENTO:** V1. Junio 2017

---

### I) Finalidad de la línea de trabajo propuesta:

La colocación de una prótesis percutánea aórtica (PPAo) es una alternativa excelente y menos agresiva a la sustitución quirúrgica convencional en pacientes con estenosis aórtica degenerativa. A pesar de ello, la evolución a largo de plazo de estos pacientes no es todo lo favorable que podría esperarse. El bloqueo del sistema renina-angiotensina ha demostrado que mejora el remodelado adverso en la estenosis aórtica severa y tras la cirugía convencional. A usted le han sustituido su válvula aórtica degenerada mediante una prótesis percutánea

#### **Selección de participantes:**

Se hará un estudio aleatorizado abierto en pacientes en más de 6 centros con 336 pacientes a los que se coloca una PPAo por estenosis aórtica severa. El grupo de tratamiento activo recibirá tratamiento habitual con ramipril. El grupo control recibirá el tratamiento habitual. En todos los pacientes se hará un seguimiento clínico durante 3 años. En todos los pacientes se hará una resonancia magnética cardíaca inicialmente tras el procedimiento y al año para valorar el remodelado ventricular.

#### **Procedimientos:**

Esta investigación conllevará un seguimiento de su evolución, con visitas al mes, a los tres y a los doce meses. Además, al año le repetiremos el ecocardiograma y la resonancia cardíaca que programaremos antes de su alta. Después contactaremos con usted telefónicamente a los tres y a los cinco años.

#### **Beneficios y Riesgos:**

El ramipril, fármaco en estudio, es un medicamento comercializado, con más de 15 años de uso, de amplia utilización en cardiología y seguro, pudiendo en ocasiones provocar tos irritativa. Su uso, en pacientes como usted, pensamos que puede mejorar el proceso de deformación del corazón que se produce por la enfermedad que ha padecido y por el implante de la nueva válvula.

#### **Duración**

El periodo esperado de su participación es 5 años.

*Los resultados de estos estudios ayudarán probablemente a tratar de manera más precisa a los enfermos con una enfermedad como la suya.*

### II) Algunas consideraciones sobre su participación:

Es importante que Vd., como participante en esta línea de trabajo, conozca varios aspectos importantes:

A) Su participación es totalmente voluntaria. Dentro del proceso de asistencia hospitalaria por su enfermedad, se realizará una encuesta clínica. Esta encuesta no interferirá con los procesos diagnósticos o terapéuticos que usted ha de recibir por causa de su enfermedad

B) Puede plantear todas las dudas que considere sobre su participación en este estudio.

C) No percibirá ninguna compensación económica o de otro tipo por su participación en el estudio. No obstante, la información generada en el mismo podría ser fuente de beneficios comerciales. En tal caso, están previstos mecanismos para que estos beneficios reviertan en la salud de la población, aunque no de forma individual en el participante.

D) La información obtenida se almacenará en una base de datos, en soporte informático, registrada en la Agencia Española de Protección de Datos, según lo indicado en la legislación vigente sobre protección de datos de carácter personal (Ley Orgánica 15/1999), de 13 de diciembre). Los datos registrados serán tratados estadísticamente de forma codificada.

E) En todo momento el participante tendrá derecho de acceso, rectificación o cancelación de los datos depositados en la base de datos siempre que expresamente lo solicite. Para ello deberá ponerse en contacto con el investigador principal. Los datos quedarán custodiados bajo la responsabilidad del Investigador Principal del Estudio, **Dr. J. Albero San Román**.

F) Los datos serán guardados de forma indefinida, al menos hasta la consecución de los fines científicos de la línea de trabajo arriba expuesta. Dichos datos podrán ser utilizados por el grupo del investigador principal en estudios futuros de investigación relacionados con la línea de trabajo arriba expuesta. Dichos datos podrán ser cedidos a otros investigadores designados por el Investigador Principal para trabajos relacionados con esta línea, siempre al servicio de proyectos que tengan alta calidad científica y respeto

por los principios éticos. En estos dos últimos casos, se solicitará antes autorización al CEIC (Comité Ético de Investigación Clínica) del Área de Salud Valladolid Este.

G) La falta de consentimiento o la revocación de este consentimiento previamente otorgado no supondrá perjuicio alguno en la asistencia sanitaria que Vd. recibe/recibirá.

H) Es posible que los estudios realizados aporten información relevante para su salud o la de sus familiares. Vd. tiene derecho a conocerla y trasmitirla a sus familiares si así lo desea.

I) Sólo si Vd. lo desea, existe la posibilidad de que pueda ser contactado en el futuro para completar o actualizar la información asociada al estudio.

**CONSENTIMIENTO INFORMADO DEL PACIENTE POR ESCRITO.**

**Estudio: Beneficio del bloqueo del sistema renina-angiotensina sobre la evolución clínica y el remodelado ventricular tras la colocación de una prótesis percutánea aórtica**

Yo, \_\_\_\_\_  
(Nombre y apellidos de paciente ó representante legal)

He leído la información que me ha sido entregada.

He recibido la hoja de información que me ha sido entregada.

He podido hacer preguntas sobre el estudio.

He recibido suficiente información sobre el estudio.

He hablado del estudio con \_\_\_\_\_  
(Nombre y apellidos del investigador)

Comprendo que mi participación es voluntaria.

Comprendo que puedo retirarme del estudio:

1.- Cuando quiera.

2.- Sin tener que dar explicaciones.

3.- Sin que esto repercuta en mis cuidados médicos.

Por la presente, otorgo mi consentimiento informado y libre para participar en esta investigación.

Accedo a que los médicos del HOSPITAL CLÍNICO UNIVERSITARIO DE VALLADOLID contacten conmigo en el futuro en caso de que se necesite obtener nuevos datos. ...SI.... NO (marcar con una X lo que proceda)

Accedo a que los médicos del HOSPITAL CLÍNICO UNIVERSITARIO DE VALLADOLID contacten conmigo en caso de que los estudios realizados sobre mis datos aporten información relevante para mi salud o la de mis familiares ...SI..... NO (marcar con una X lo que proceda)

Una vez firmada, me será entregada una copia del documento de consentimiento.

\_\_\_\_\_  
FIRMA DEL PACIENTE/REPRESENTANTE LEGAL                      NOMBRE Y APELLIDO      FECHA

Yo he explicado por completo los detalles relevantes de este estudio al paciente nombrado anteriormente y/o la persona autorizada a dar el consentimiento en nombre del paciente.

\_\_\_\_\_  
FIRMA DEL INVESTIGADOR                                      NOMBRE Y APELLIDOS                                      FECHA

**CONSENTIMIENTO INFORMADO DEL PACIENTE POR ESCRITO.**

**APARTADO PARA LA REVOCACIÓN DEL CONSENTIMIENTO (CONTACTAR CON EL INVESTIGADOR PRINCIPAL)**

Yo \_\_\_\_\_ revoco el consentimiento de participación en el estudio, arriba firmado con fecha \_\_\_\_\_

**Firma:**
